# Supplementary material
Source: Research Square preprint supplement (doi:10.21203/rs.3.rs-9281710/v1)

Figure-3O-HO-1

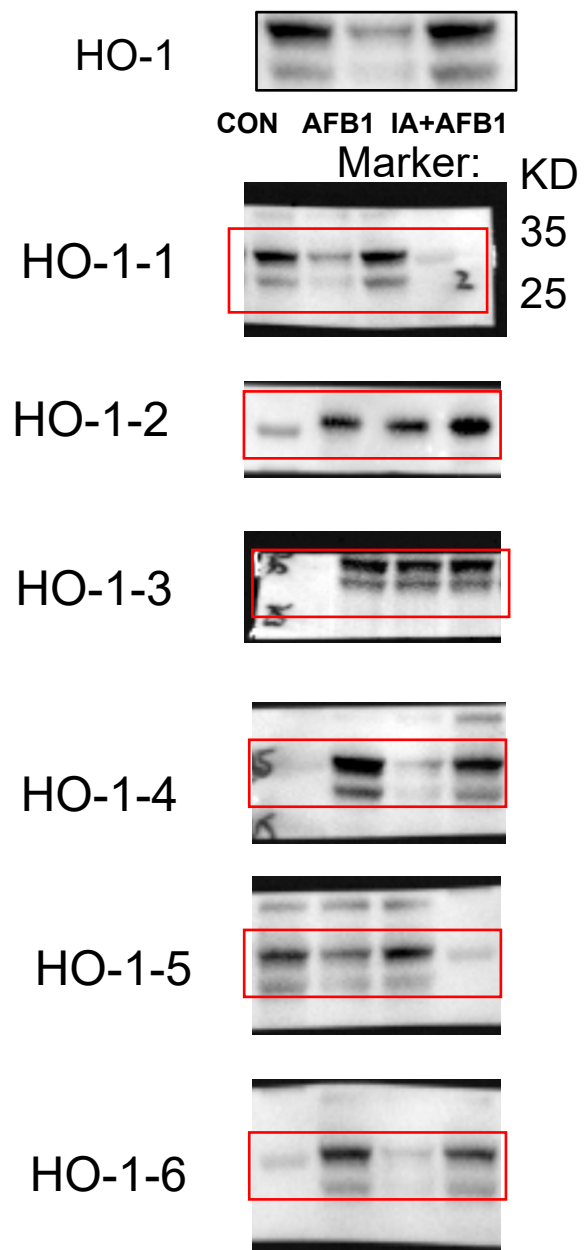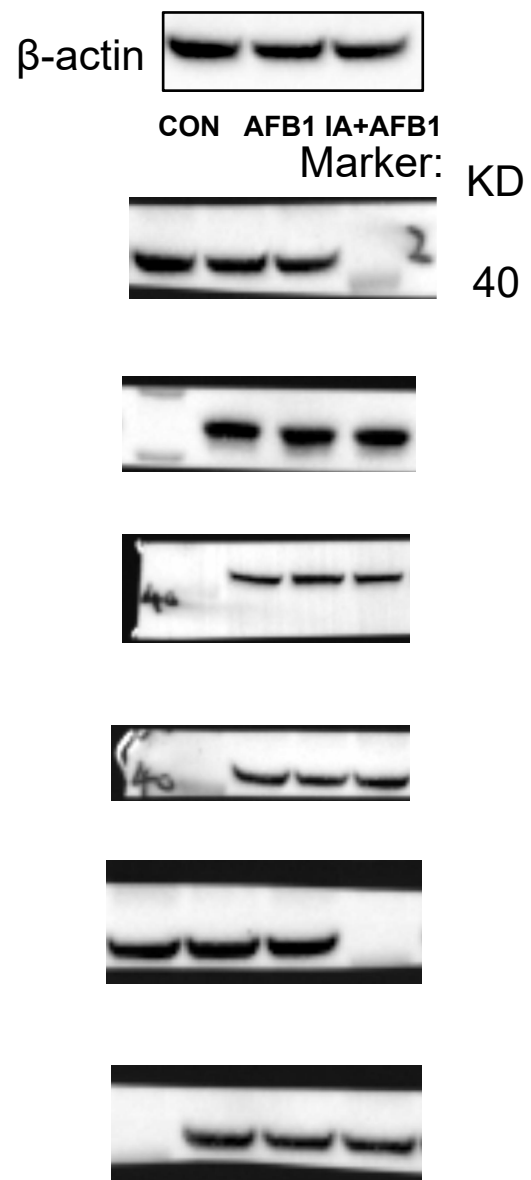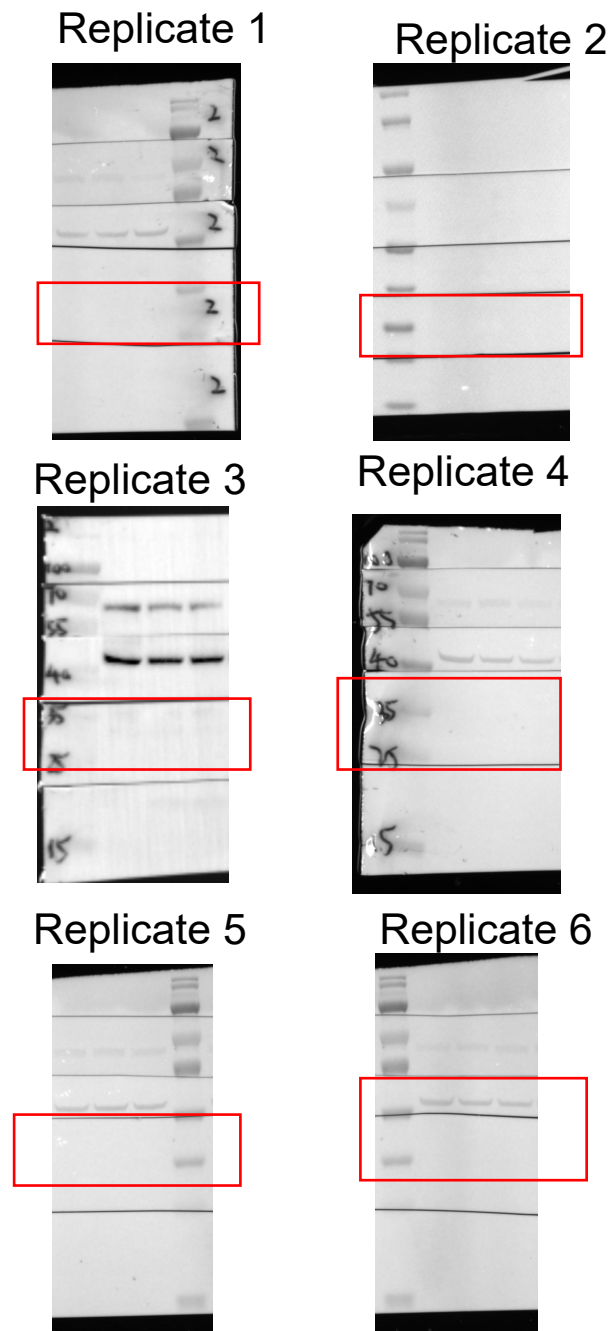

Figure-3O-xCT

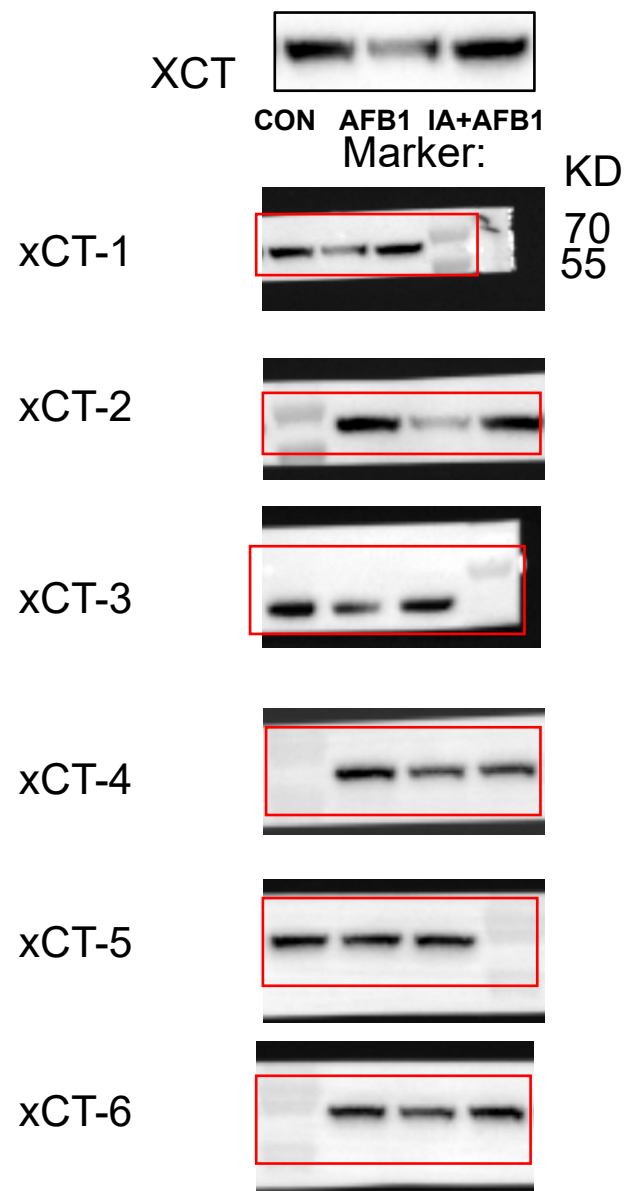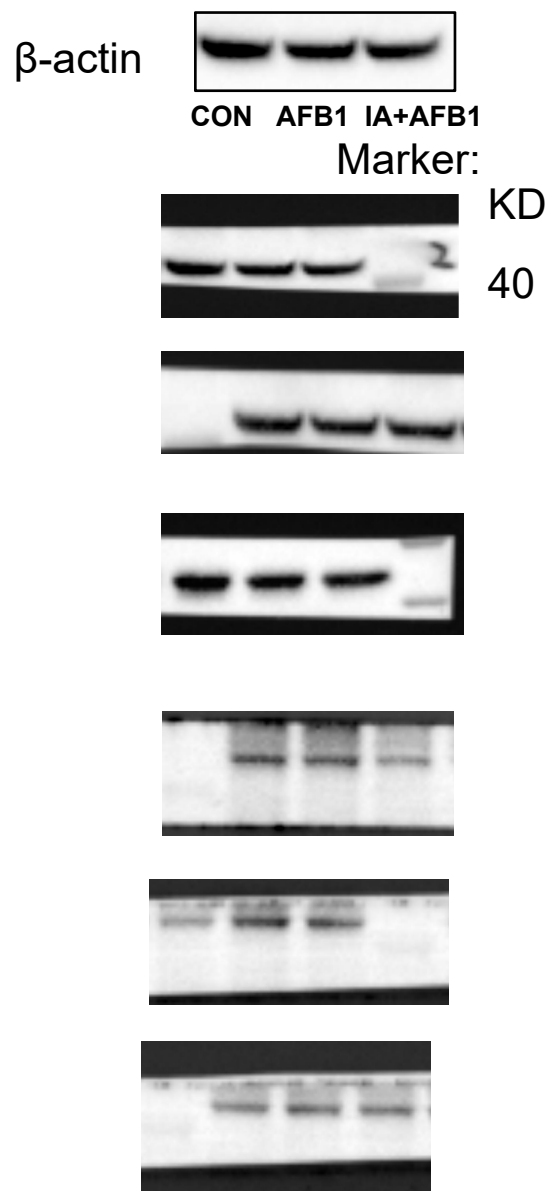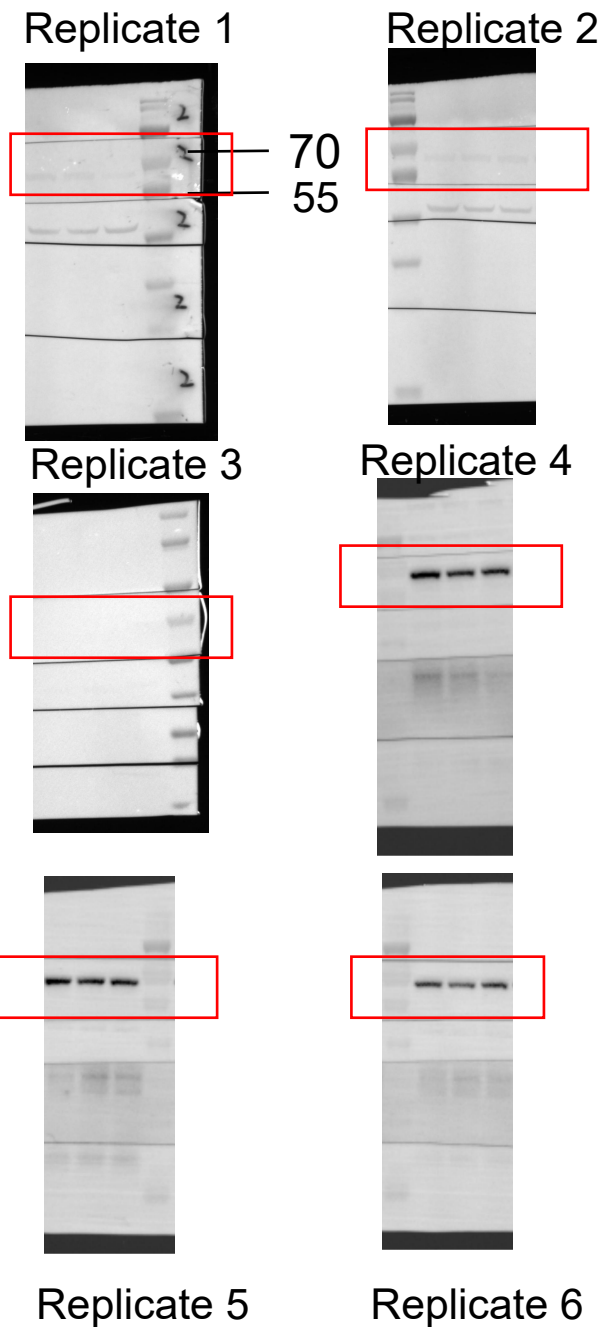

Figure-3O-GPX4

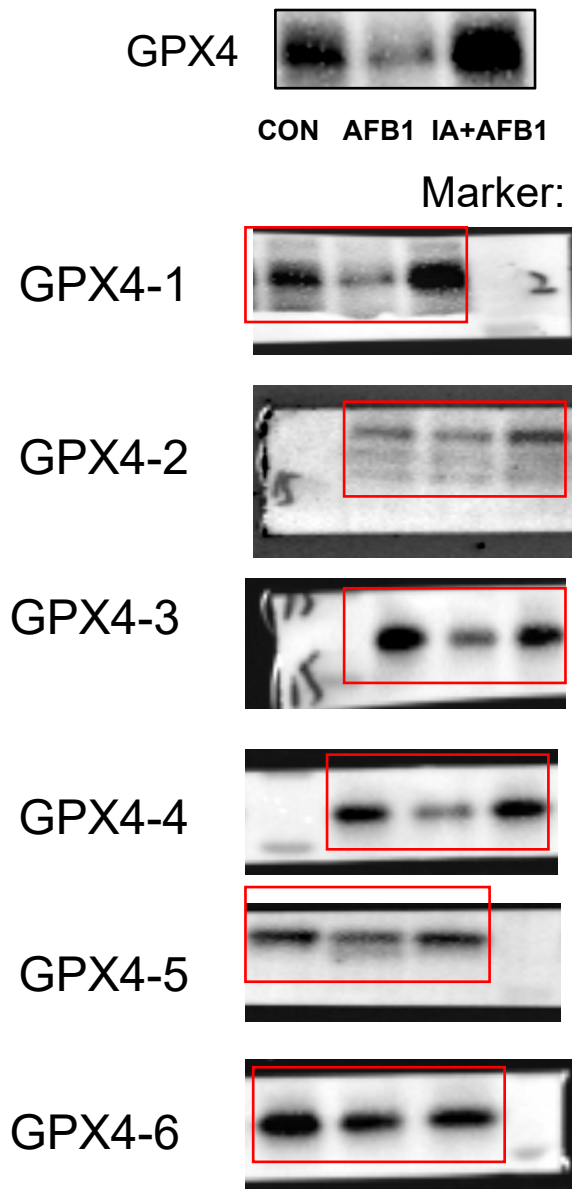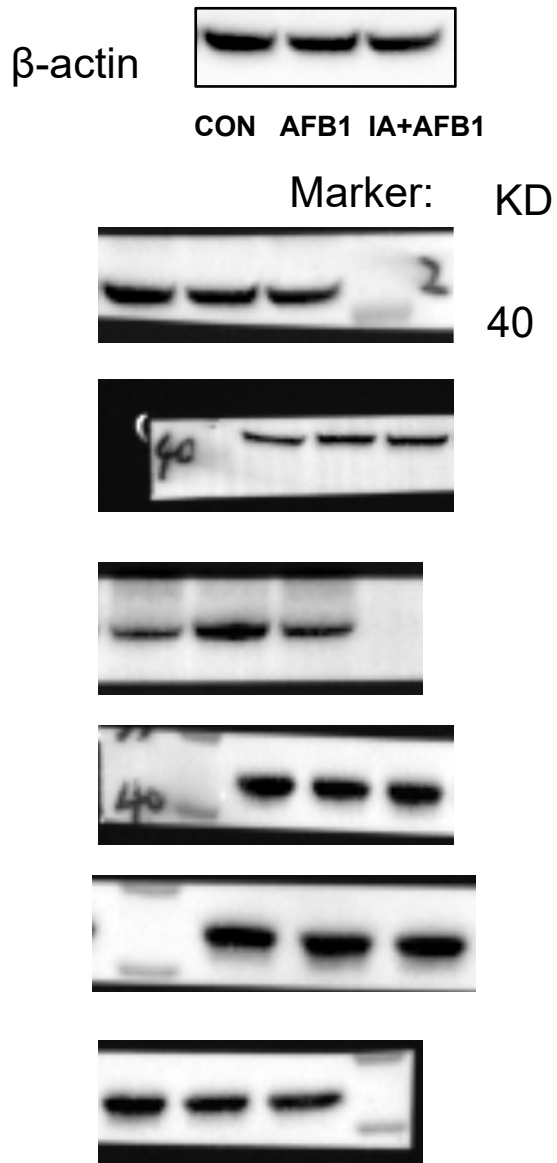

Replicate 1

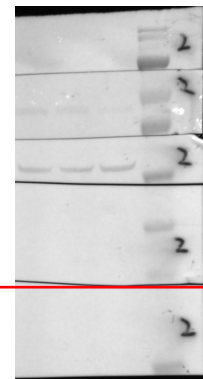

Replicate 2

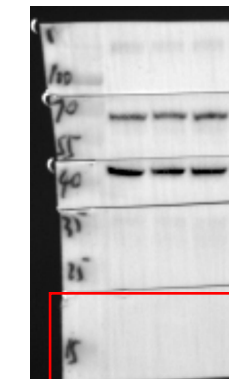

Replicate 3

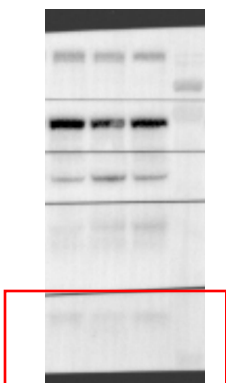

Replicate 4

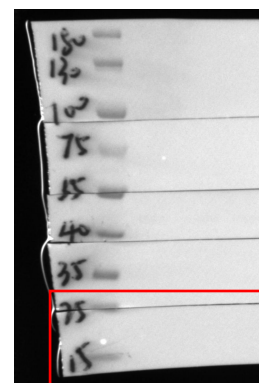

Replicate 5

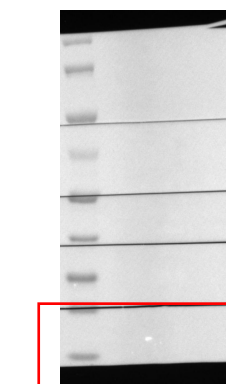

Replicate 6

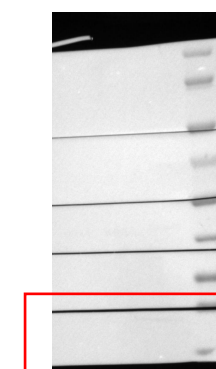

Figure-3X-HO-1

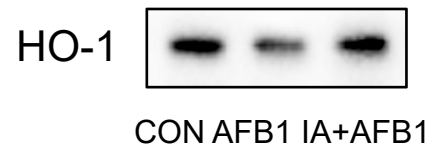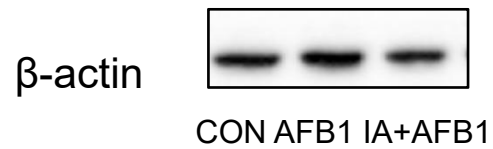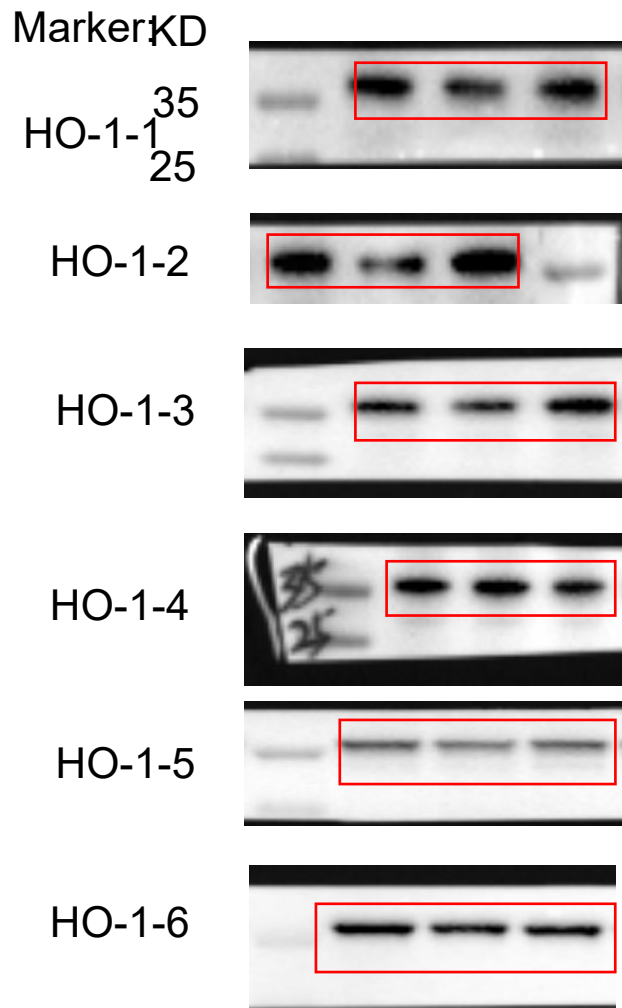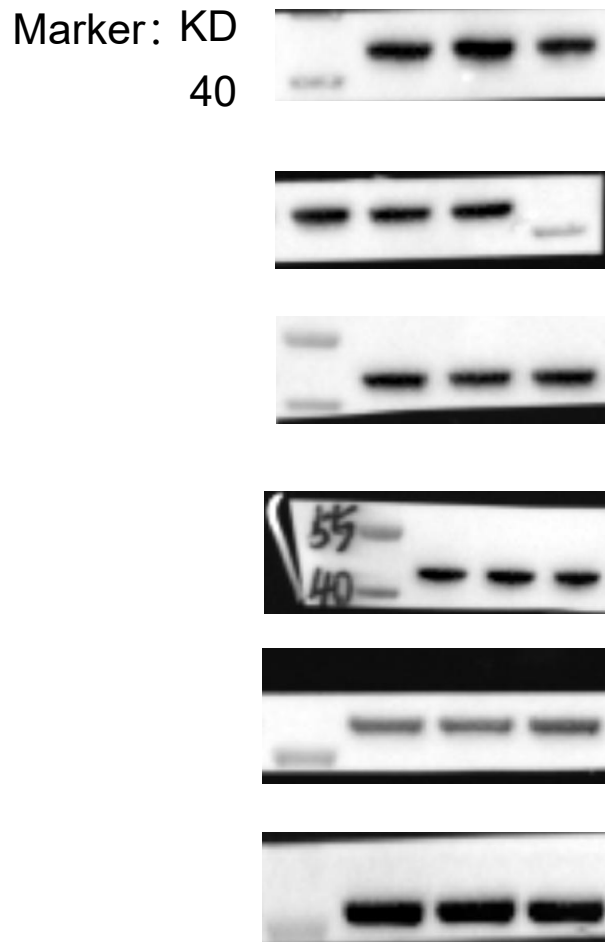

Replicate 1

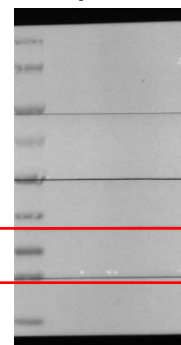

Replicate 2

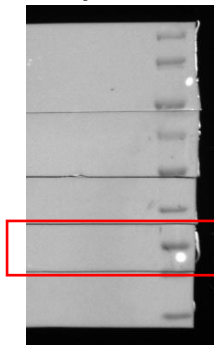

Replicate 3

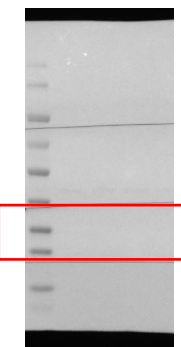

Replicate 4

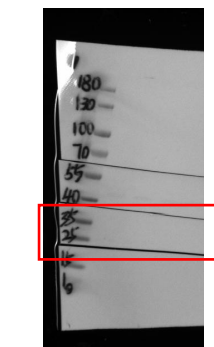

Replicate 5

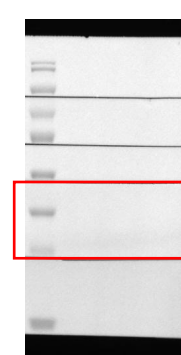

Replicate 6

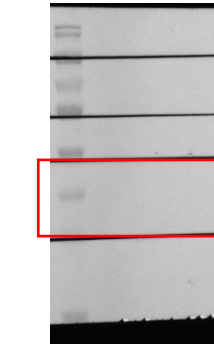

Figure-3X-xCT

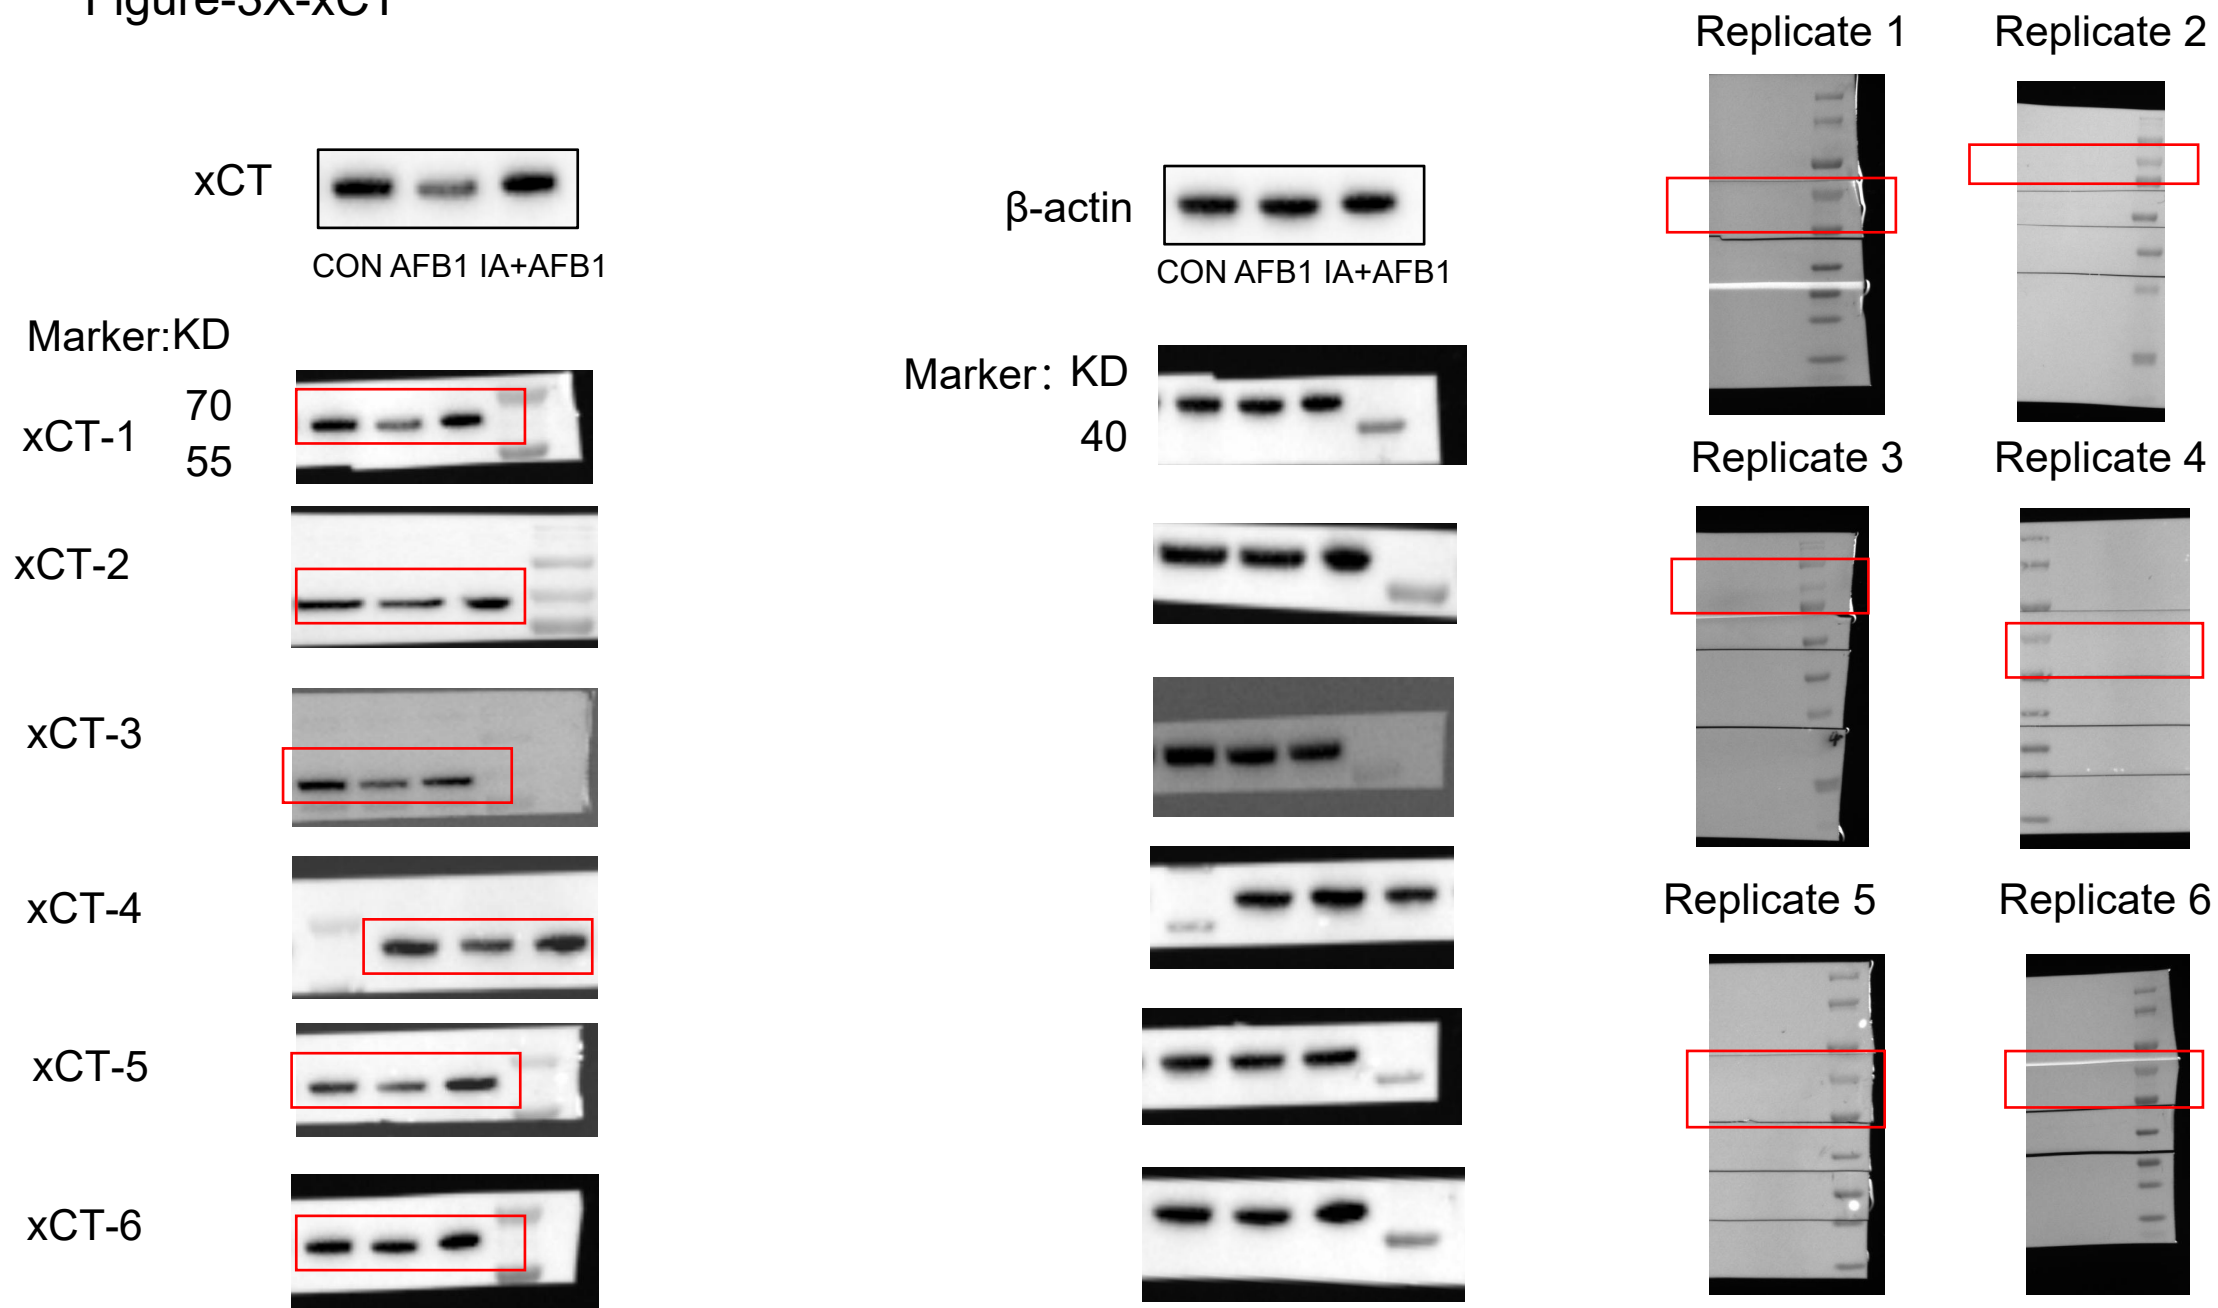

Figure-3X-GPX4

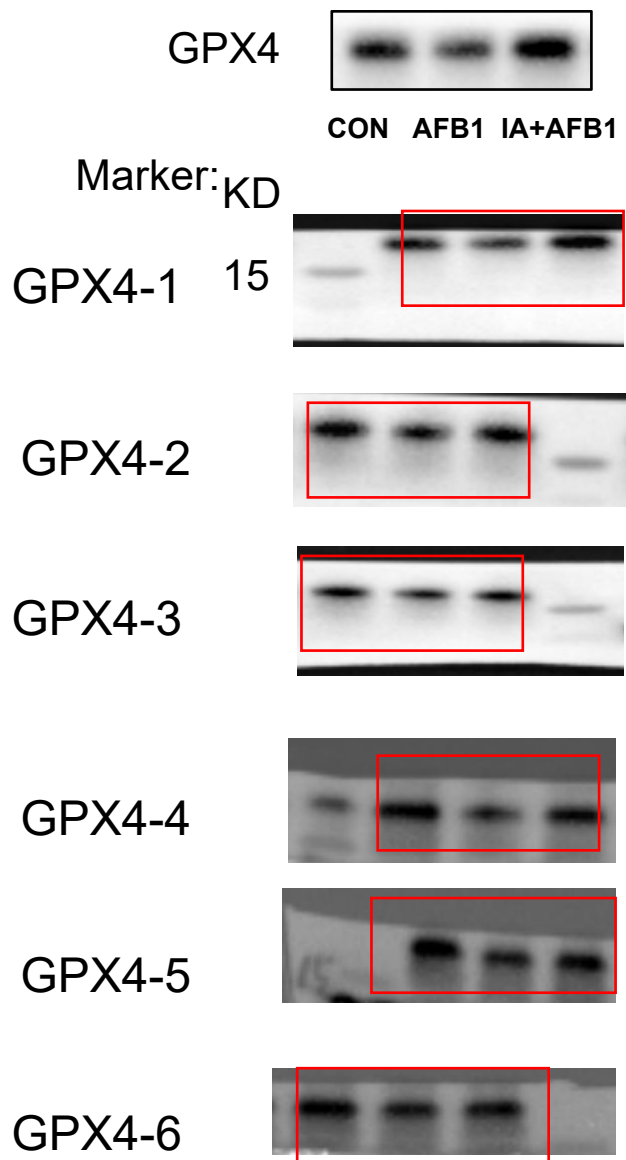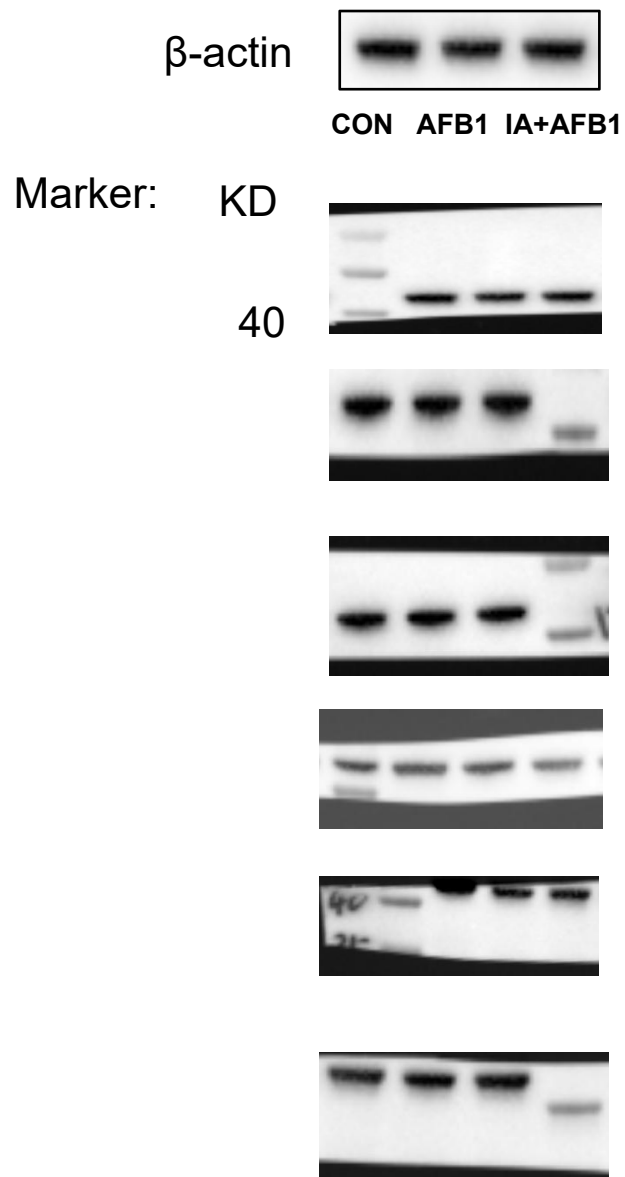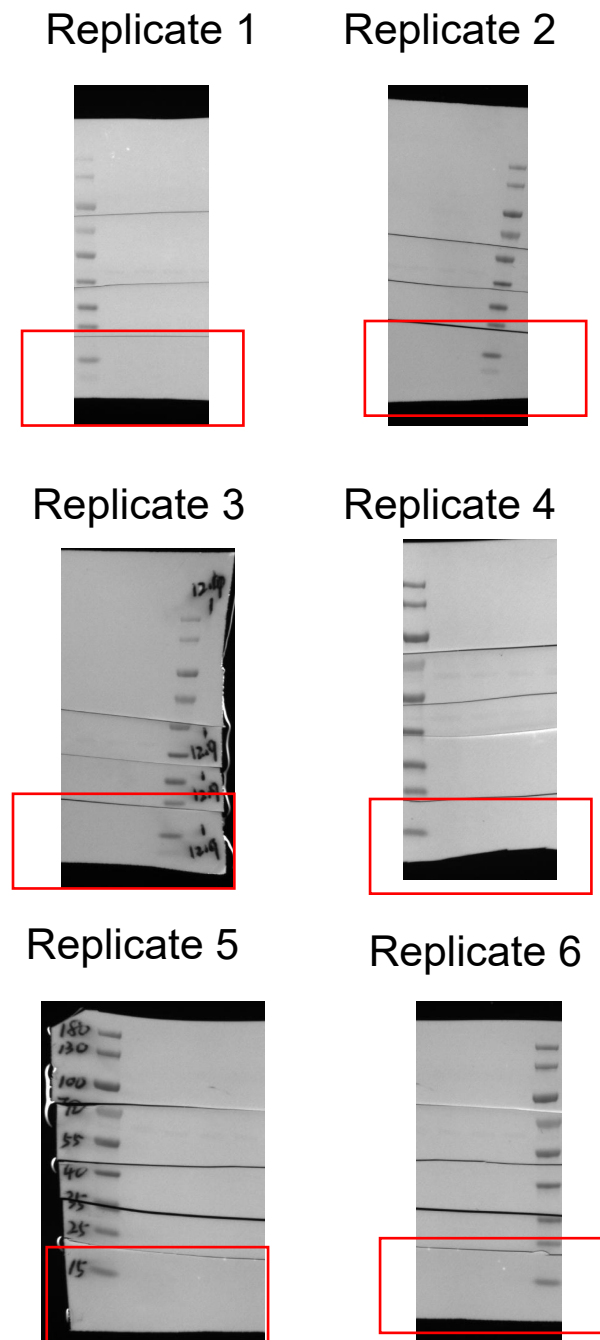

Figure4H-HO-1

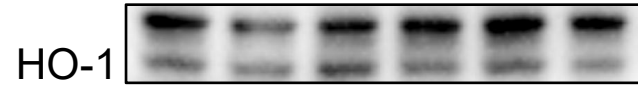

|       |   |   |   |   |   |   |
|-------|---|---|---|---|---|---|
| HO-1  | - | + | + | - | + | + |
| AFB1  | - | + | + | - | + | + |
| IA    | - | - | + | - | - | + |
| Fer-1 | - | - | - | + | + | + |

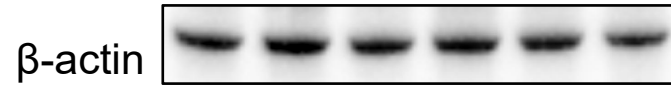

|         |   |   |   |   |   |   |
|---------|---|---|---|---|---|---|
| β-actin | - | + | + | - | + | + |
| AFB1    | - | + | + | - | + | + |
| IA      | - | - | + | - | - | + |
| Fer-1   | - | - | - | + | + | + |

Marker:

KD

Marker:

KD

40

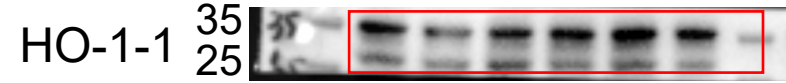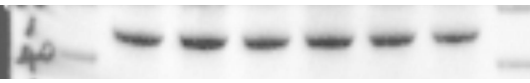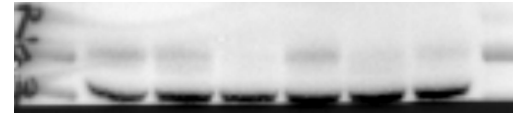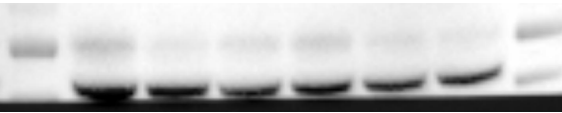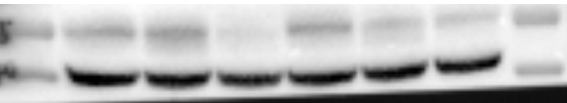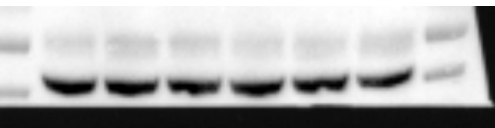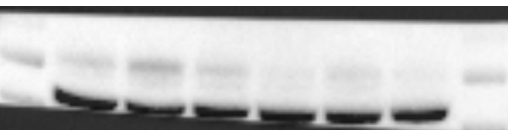

Replicate 1

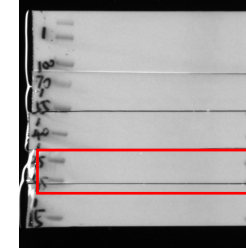

Replicate 2

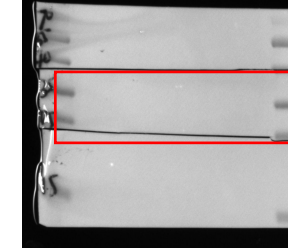

Replicate 3

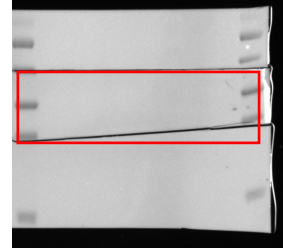

Replicate 4

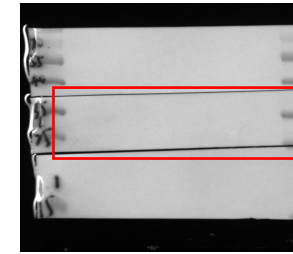

Replicate 5

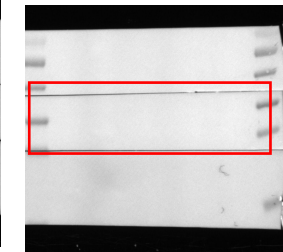

Replicate 6

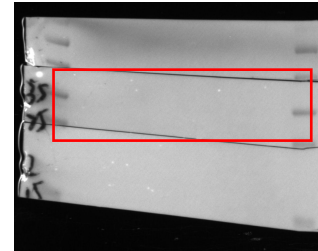

HO-1-2

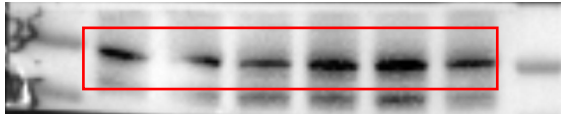

HO-1-3

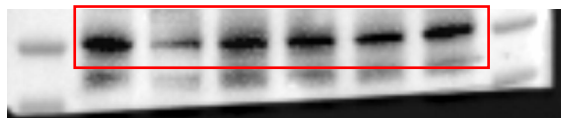

HO-1-4

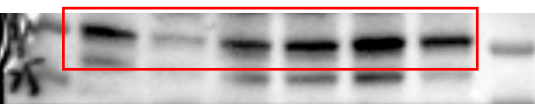

HO-1-5

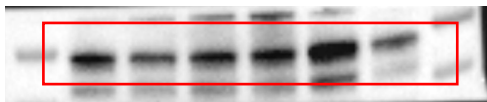

HO-1-6

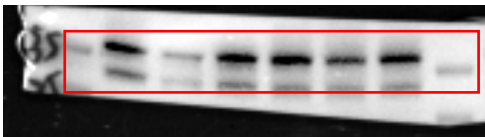

# Figur4H-xCT

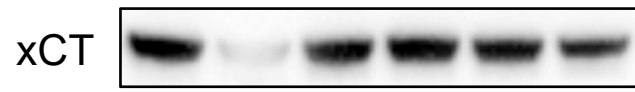

|       |   |   |   |   |   |   |
|-------|---|---|---|---|---|---|
| xCT   |   |   |   |   |   |   |
| AFB1  | - | + | + | - | + | + |
| IA    | - | - | + | - | - | + |
| Fer-1 | - | - | - | + | + | + |

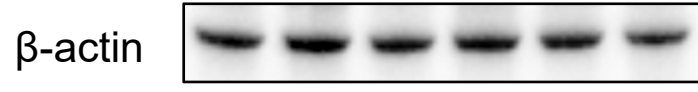

|                |   |   |   |   |   |   |
|----------------|---|---|---|---|---|---|
| $\beta$ -actin |   |   |   |   |   |   |
| AFB1           | - | + | + | - | + | + |
| IA             | - | - | + | - | - | + |
| Fer-1          | - | - | - | + | + | + |

Marker:  
KD

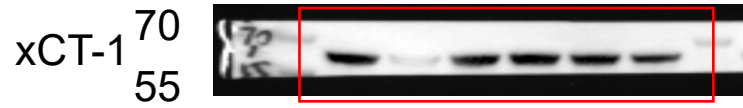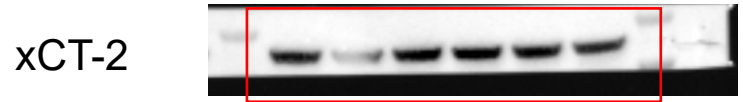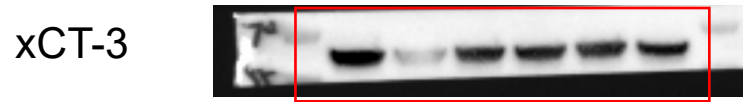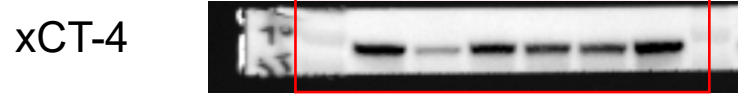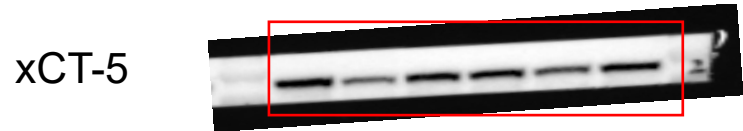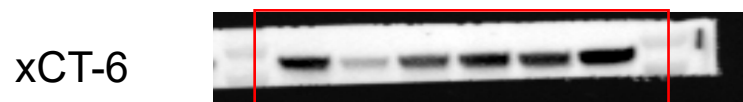

Marker:  
KD

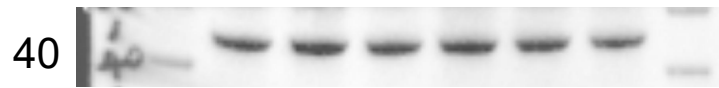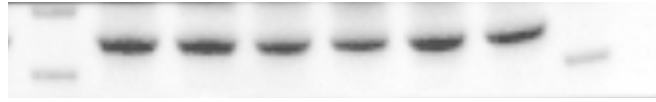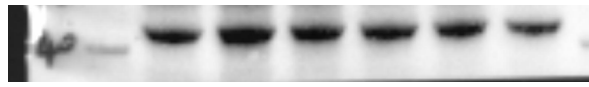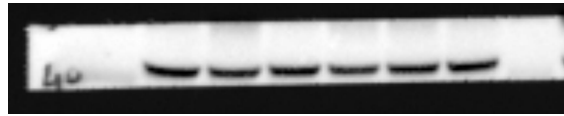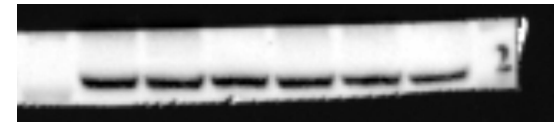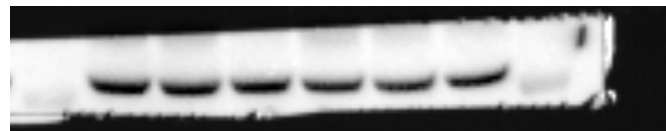

Replicate 1

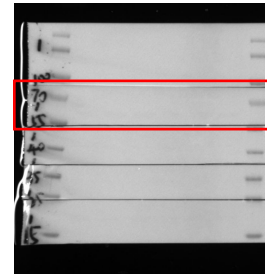

Replicate 2

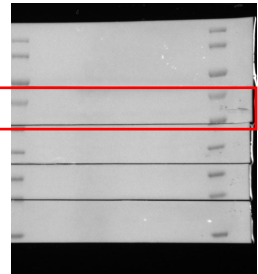

Replicate 3

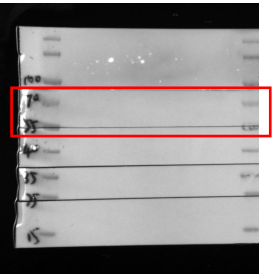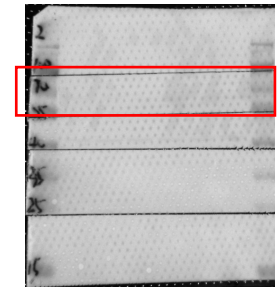

Replicate 4

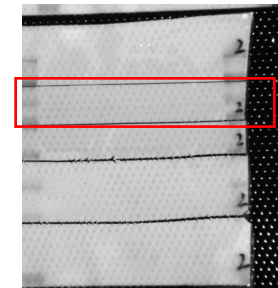

Replicate 5

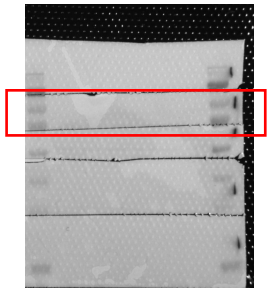

Replicate 6

Figure4H-GPX4

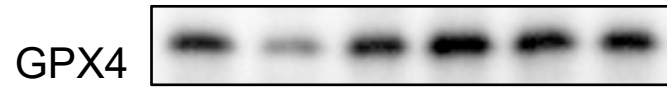

|       |   |   |   |   |   |   |
|-------|---|---|---|---|---|---|
| GPX4  | - | + | + | - | + | + |
| AFB1  | - | + | + | - | + | + |
| IA    | - | - | + | - | - | + |
| Fer-1 | - | - | - | + | + | + |

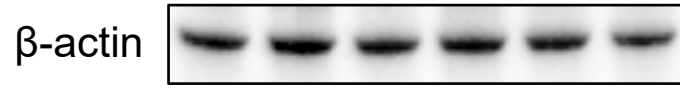

|                |   |   |   |   |   |   |
|----------------|---|---|---|---|---|---|
| $\beta$ -actin | - | + | + | - | + | + |
| AFB1           | - | + | + | - | + | + |
| IA             | - | - | + | - | - | + |
| Fer-1          | - | - | - | + | + | + |

Marker:

KD

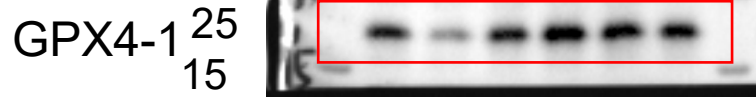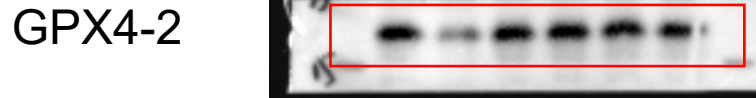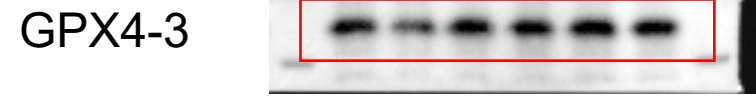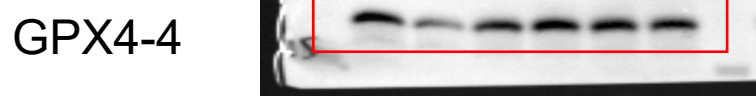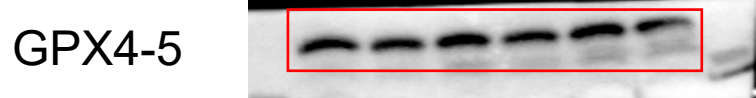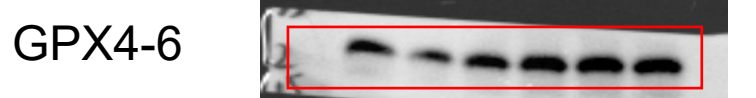

Marker:

KD

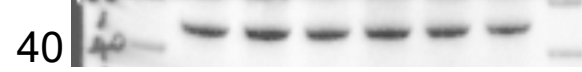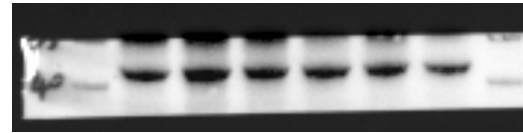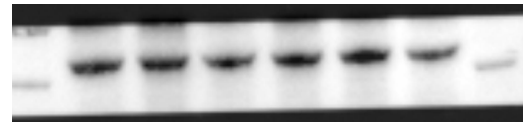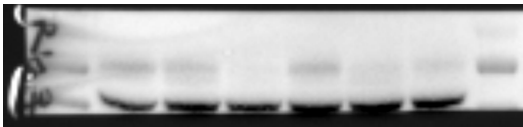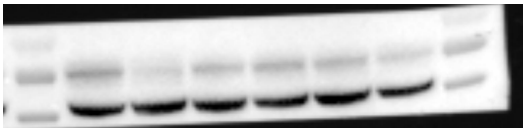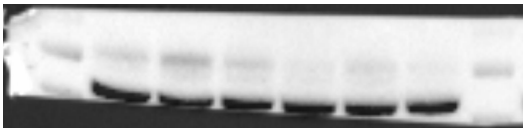

Replicate 1

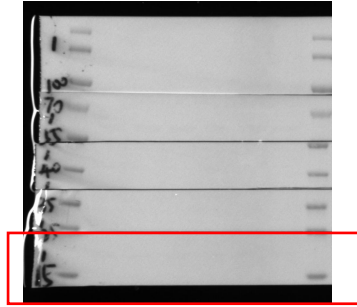

Replicate 2

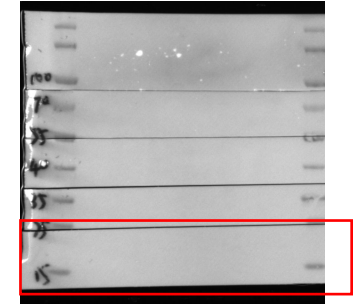

Replicate 3

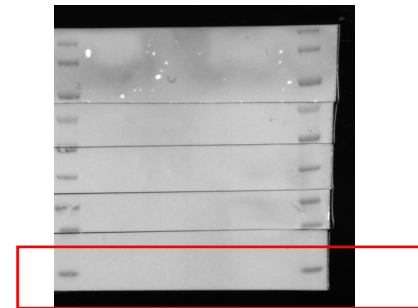

Replicate 4

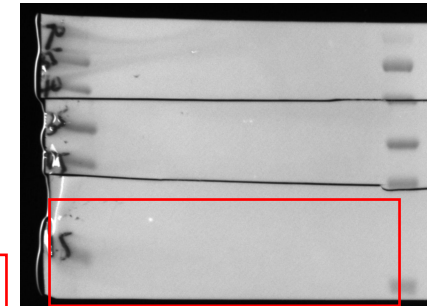

Replicate 5

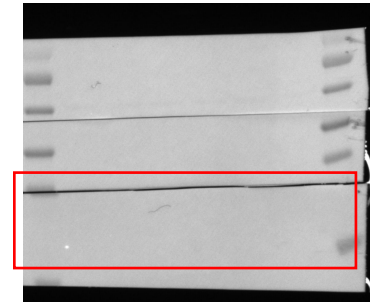

Replicate 6

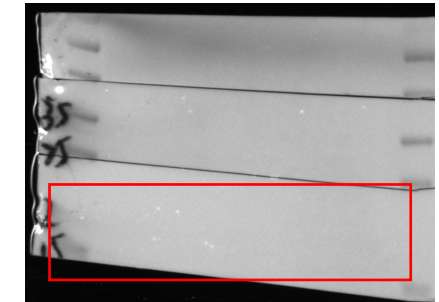

Figure-5B-AhR

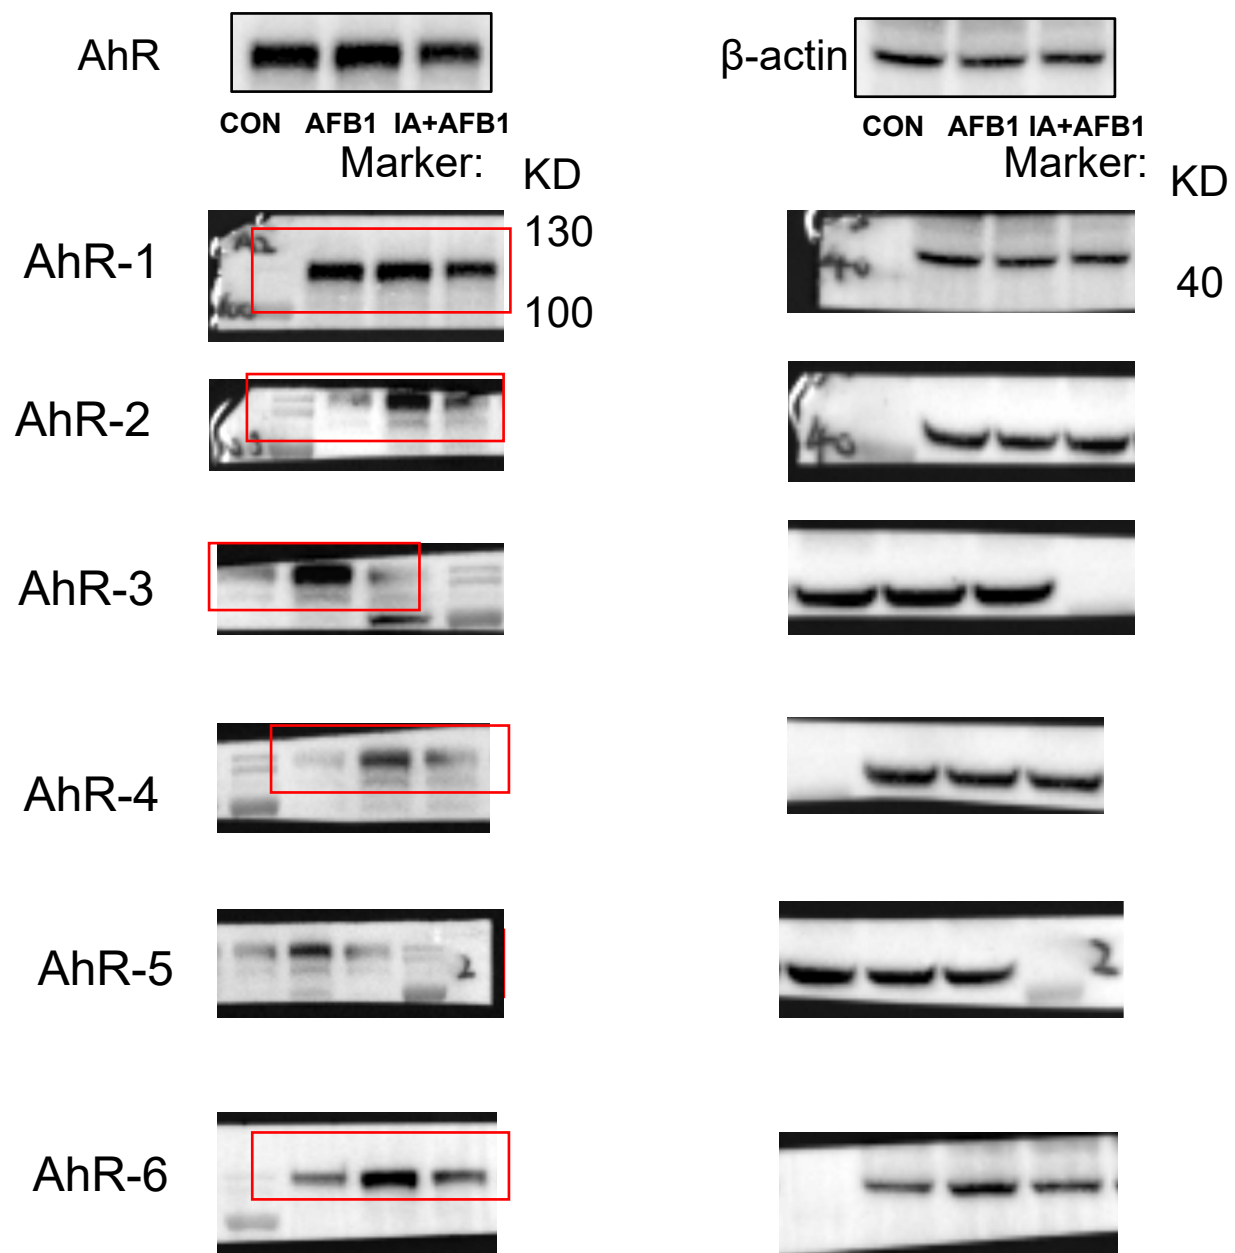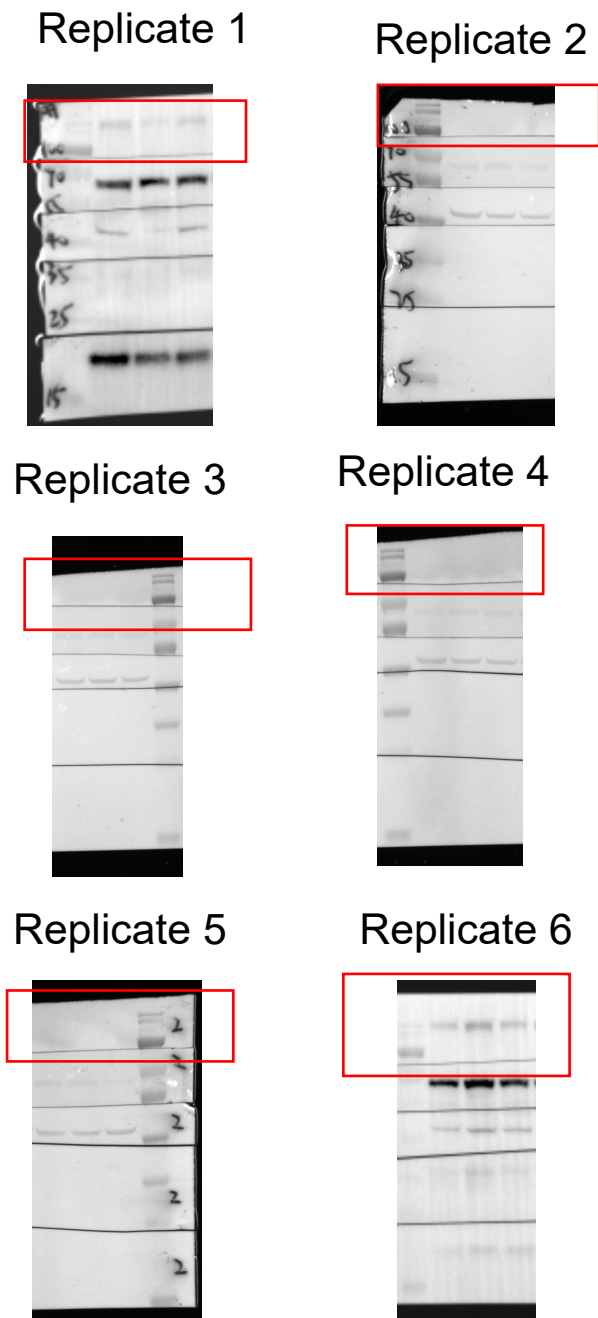

Figure-6G–AhR

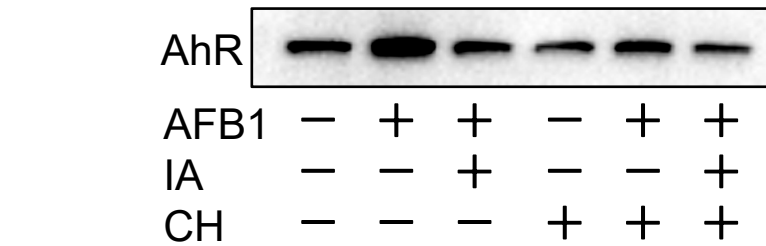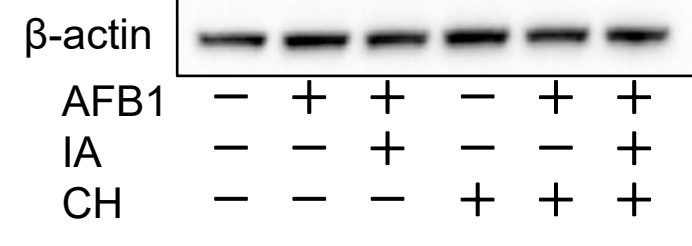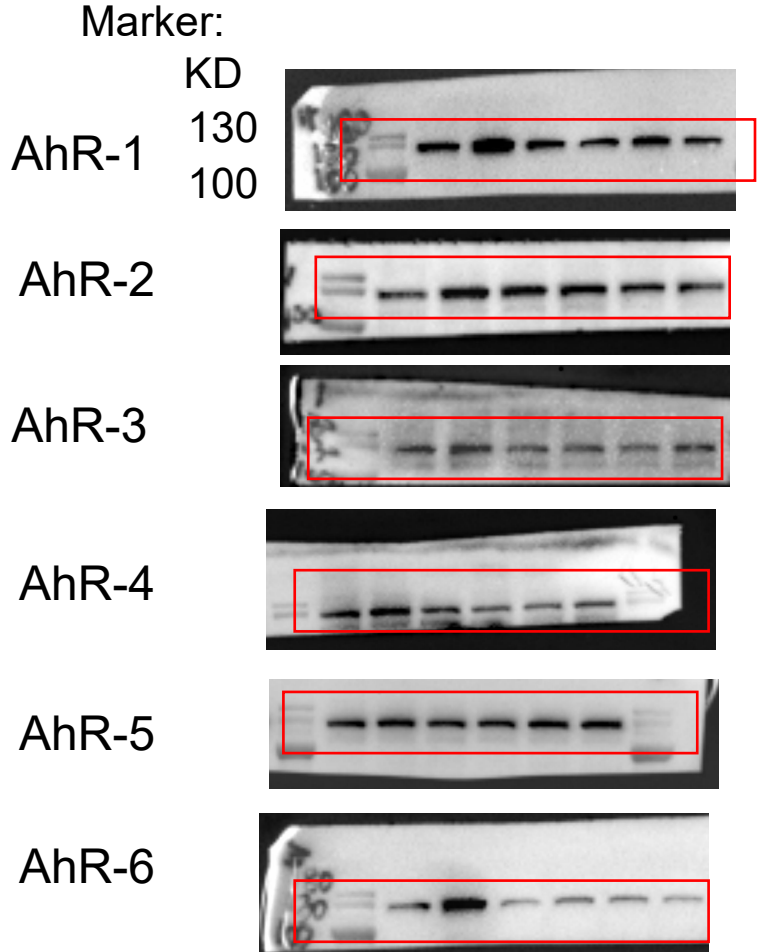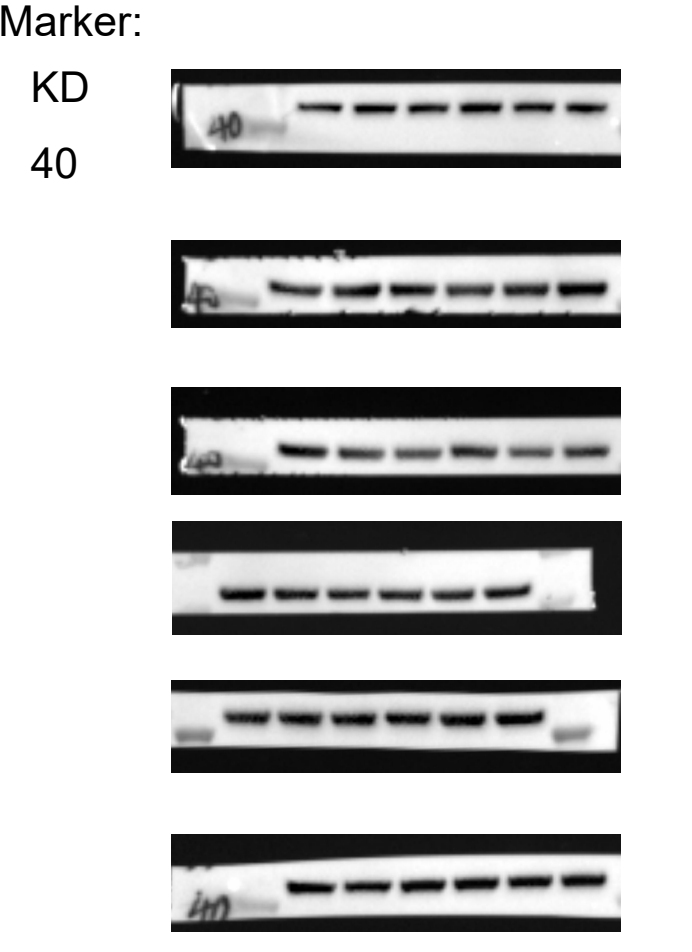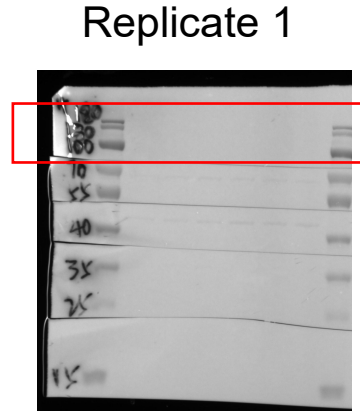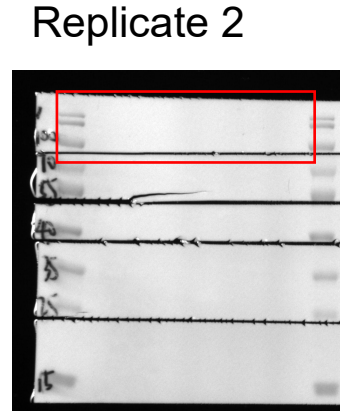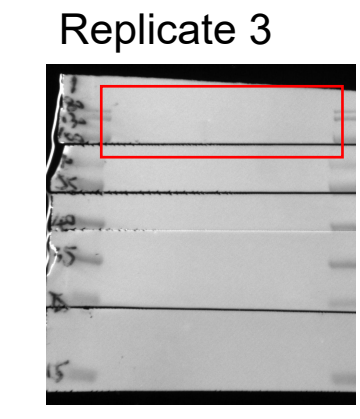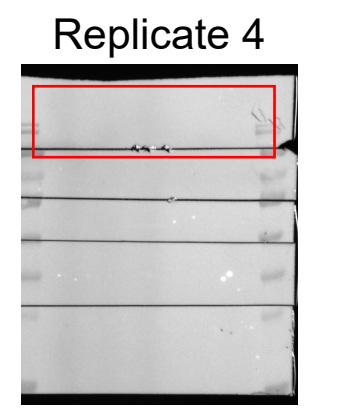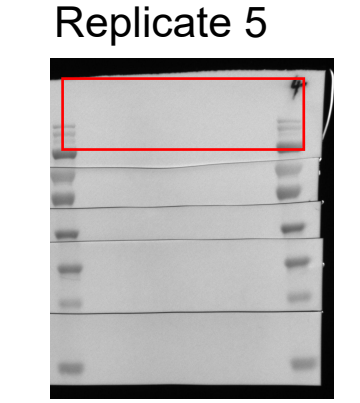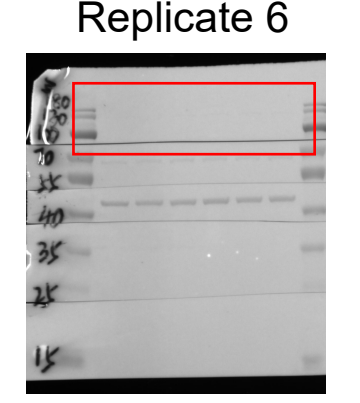



Figure-6G-xCT

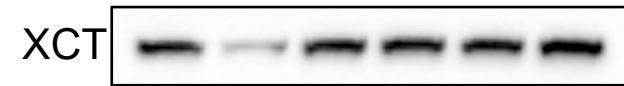

|      |   |   |   |   |   |   |
|------|---|---|---|---|---|---|
| AFB1 | - | + | + | - | + | + |
| IA   | - | - | + | - | - | + |
| CH   | - | - | - | + | + | + |

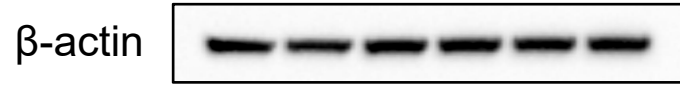

|      |   |   |   |   |   |   |
|------|---|---|---|---|---|---|
| AFB1 | - | + | + | - | + | + |
| IA   | - | - | + | - | - | + |
| CH   | - | - | - | + | + | + |

Marker:  
KD

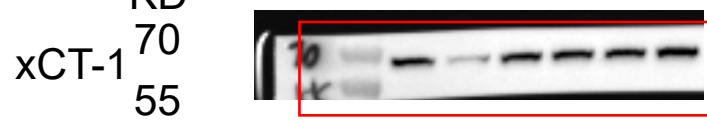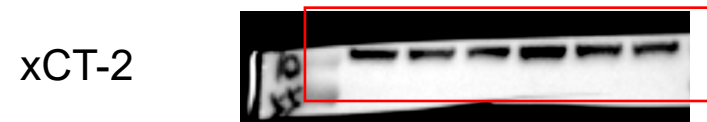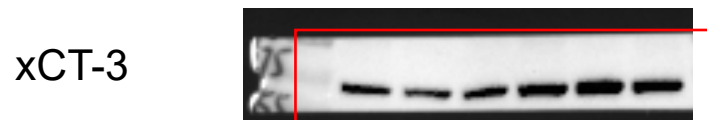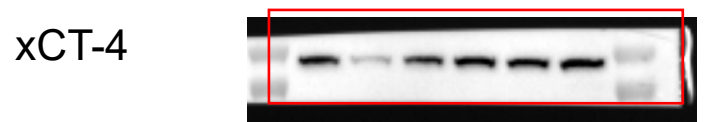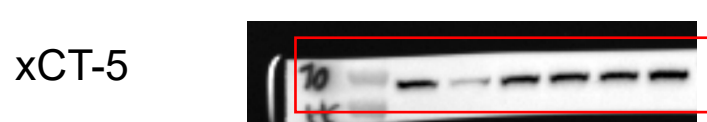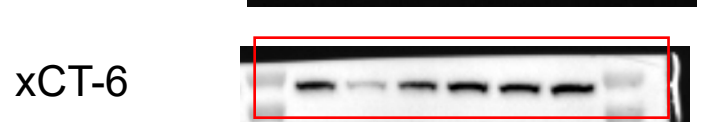

Marker:  
KD

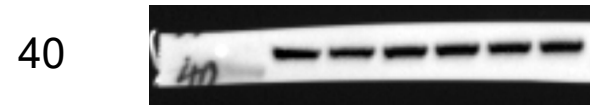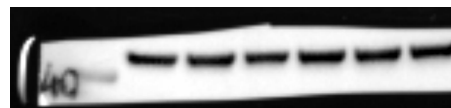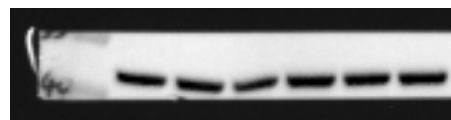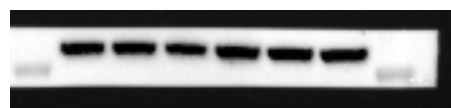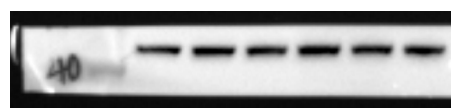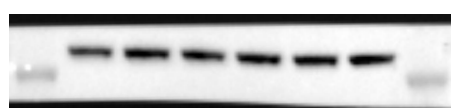

Replicate 1

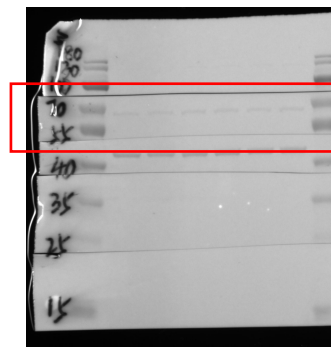

Replicate 2

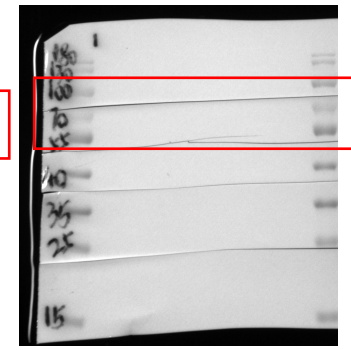

Replicate 3

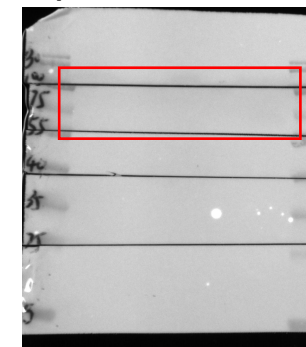

Replicate 4

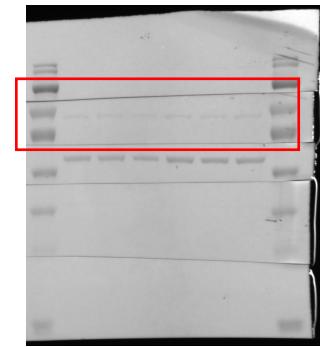

Replicate 5

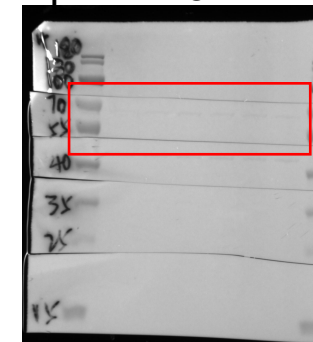

Replicate 6

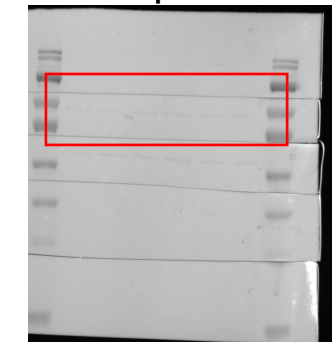

Figure-6G-GPX4

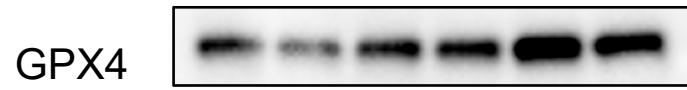

|      |   |   |   |   |   |   |
|------|---|---|---|---|---|---|
| GPX4 | - | + | + | - | + | + |
| AFB1 | - | + | + | - | + | + |
| IA   | - | - | + | - | - | + |
| CH   | - | - | - | + | + | + |

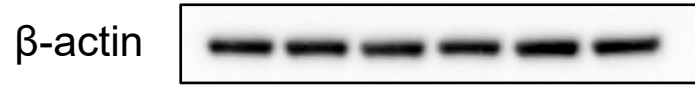

|                |   |   |   |   |   |   |
|----------------|---|---|---|---|---|---|
| $\beta$ -actin | - | + | + | - | + | + |
| AFB1           | - | + | + | - | + | + |
| IA             | - | - | + | - | - | + |
| CH             | - | - | - | + | + | + |

Marker:

KD

GPX4-1

25  
15

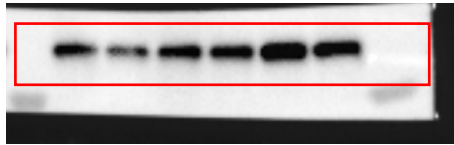

GPX4-2

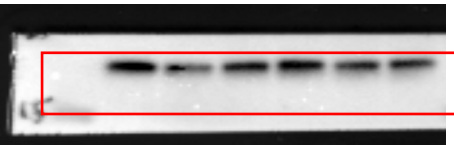

GPX4-3

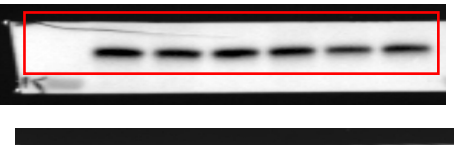

GPX4-4

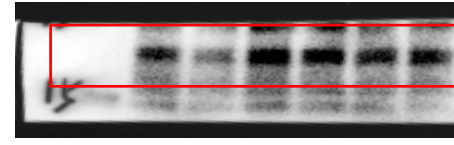

GPX4-5

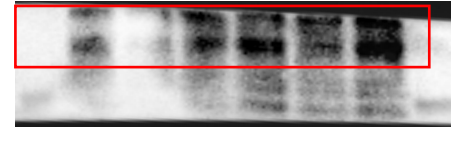

GPX4-6

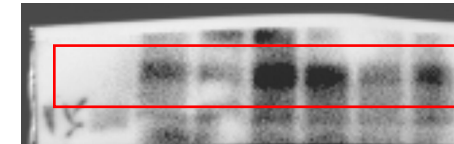

Marker:

KD

40

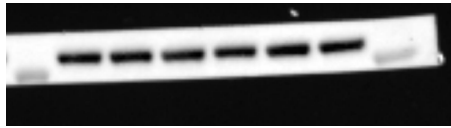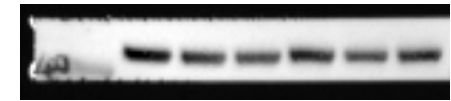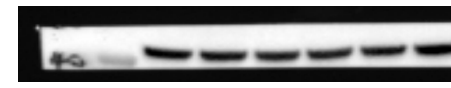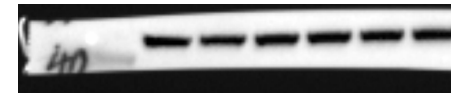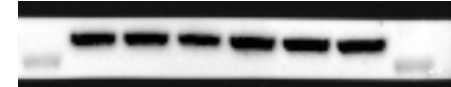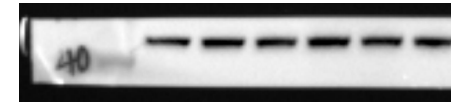

Replicate 1

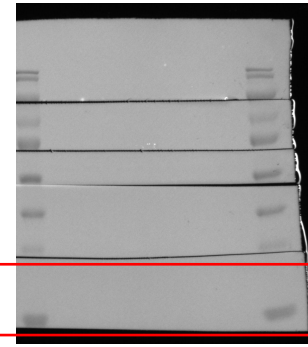

Replicate 2

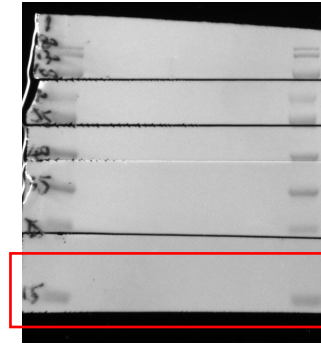

Replicate 3

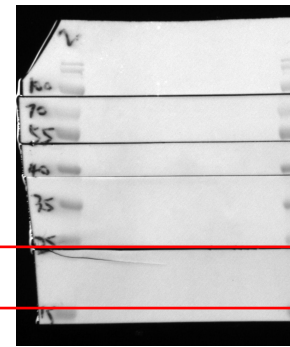

Replicate 4

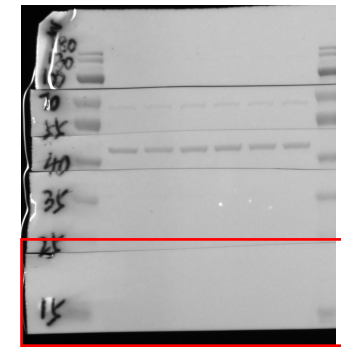

Replicate 5

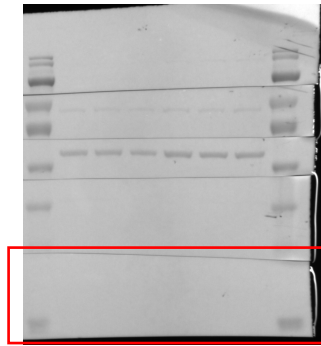

Replicate 6

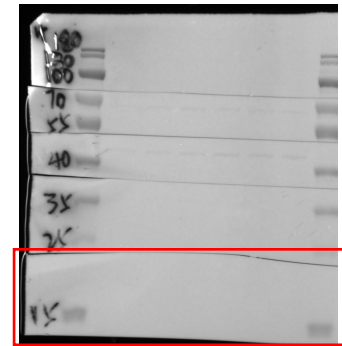

Figure-6N-AhR

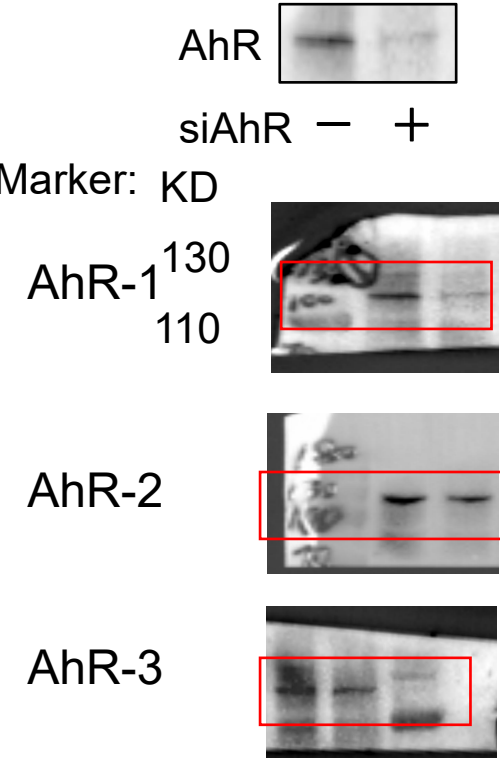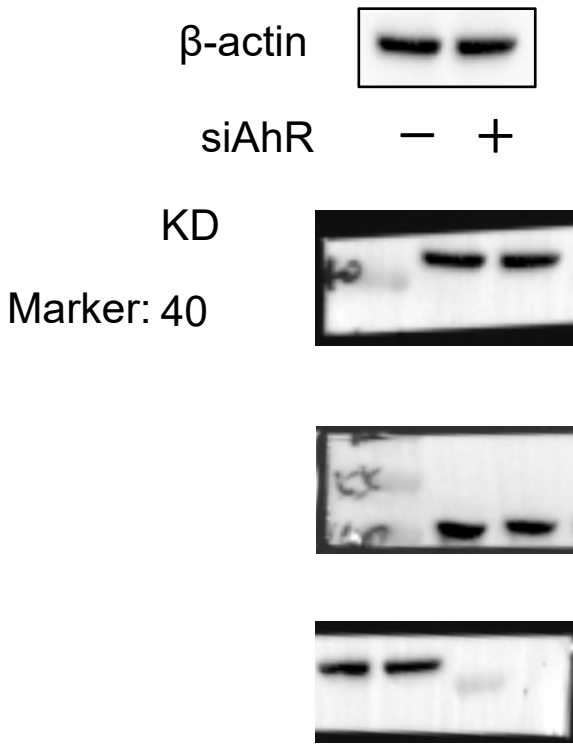

Replicate 1

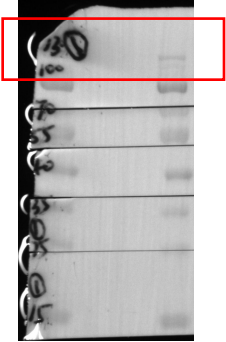

Replicate 2

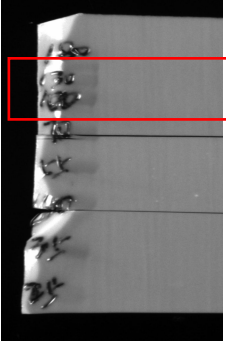

Replicate 3

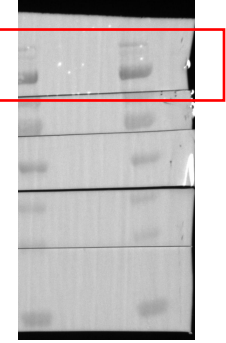

Figure-6S-AhR

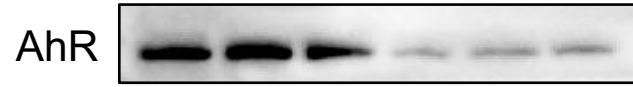

|       |   |   |   |   |   |   |
|-------|---|---|---|---|---|---|
| AhR   | - | + | + | - | + | + |
| AFB1  | - | + | + | - | + | + |
| IA    | - | - | + | - | - | + |
| siAhR | - | - | - | + | + | + |

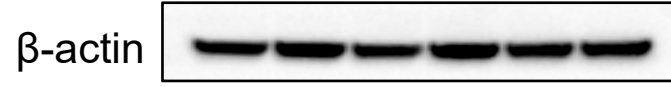

|         |   |   |   |   |   |   |
|---------|---|---|---|---|---|---|
| β-actin | - | + | + | - | + | + |
| AFB1    | - | + | + | - | + | + |
| IA      | - | - | + | - | - | + |
| siAhR   | - | - | - | + | + | + |

Marker:

KD

130

100

AhR-1

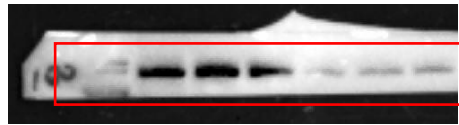

Marker:

KD

40

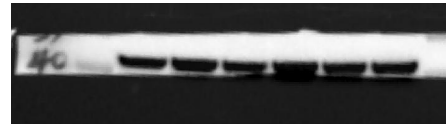

Replicate 1

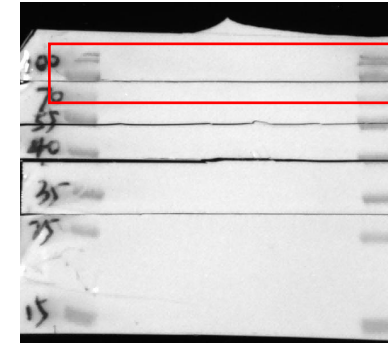

Replicate 2

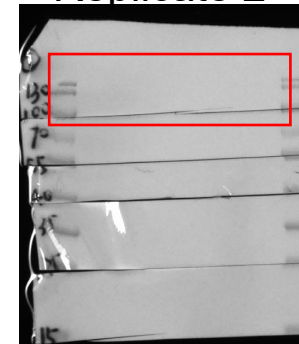

Replicate 3

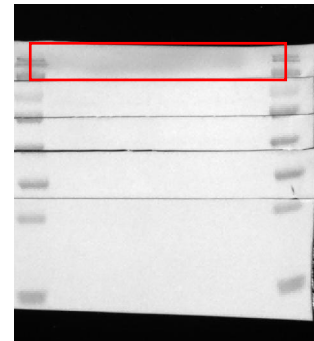

AhR-2

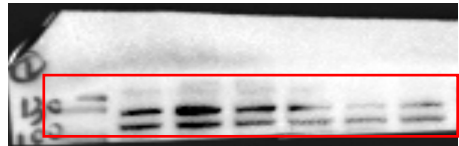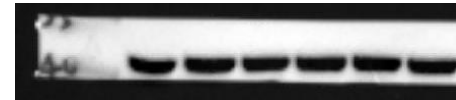

AhR-3

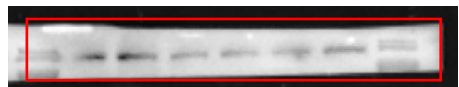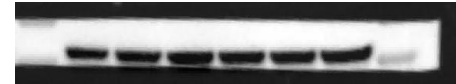

Figure-6S-HO-1

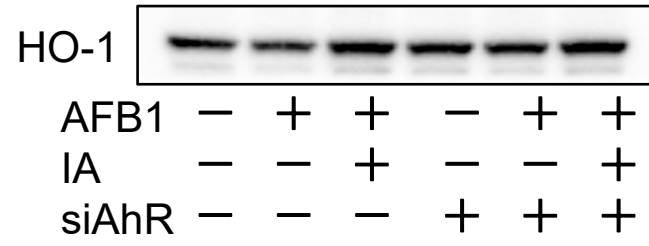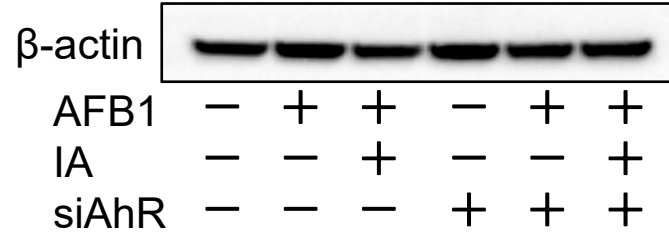

Marker: KD  
HO-1-1 35  
25

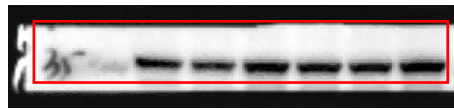

HO-1-2

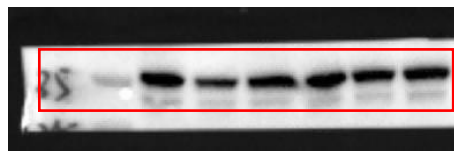

HO-1-3

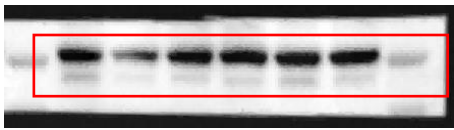

Marker:

KD  
40

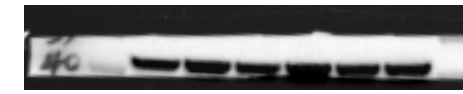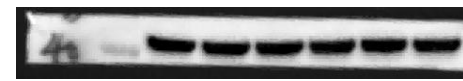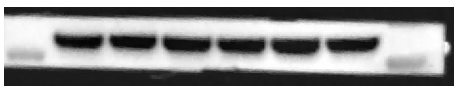

Replicate 1

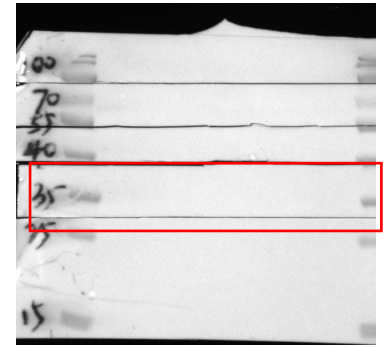

Replicate 2

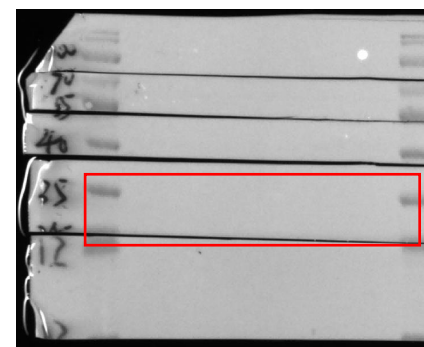

Replicate 3

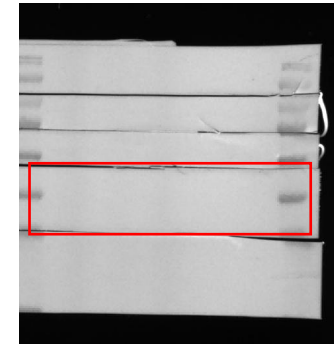

Figure-6S-xCT

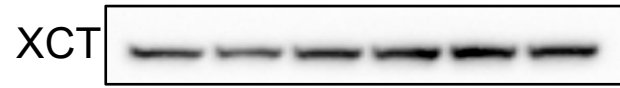

|       |   |   |   |   |   |   |
|-------|---|---|---|---|---|---|
| AFB1  | - | + | + | - | + | + |
| IA    | - | - | + | - | - | + |
| siAhR | - | - | - | + | + | + |

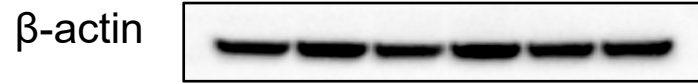

|       |   |   |   |   |   |   |
|-------|---|---|---|---|---|---|
| AFB1  | - | + | + | - | + | + |
| IA    | - | - | + | - | - | + |
| siAhR | - | - | - | + | + | + |

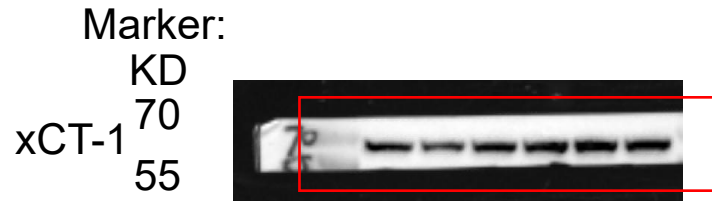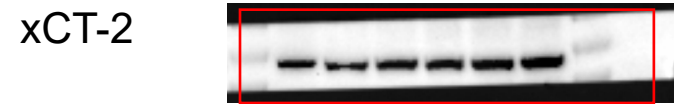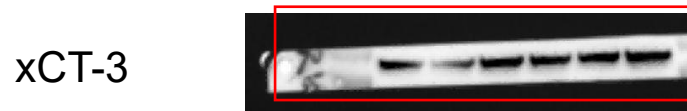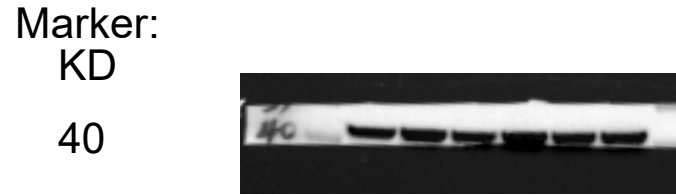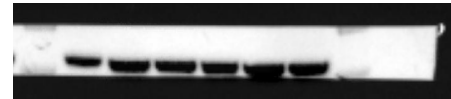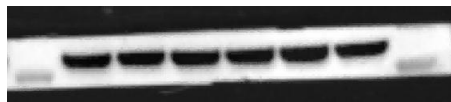

Replicate 1

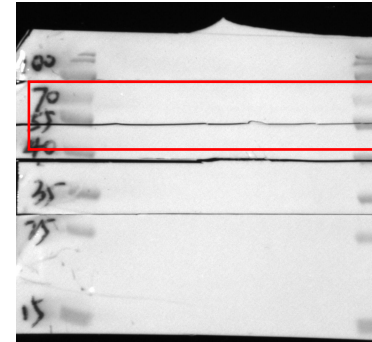

Replicate 2

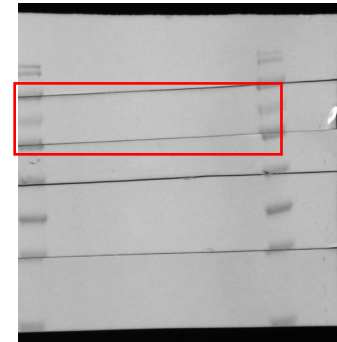

Replicate 3

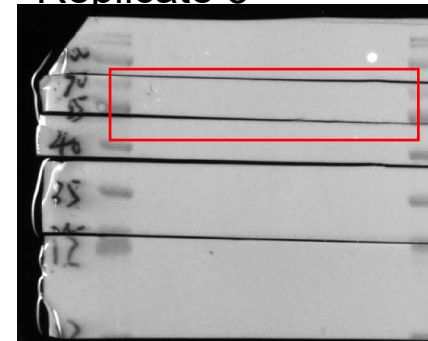

Figure-6S-GPX4

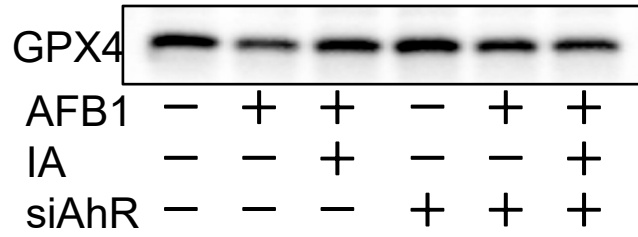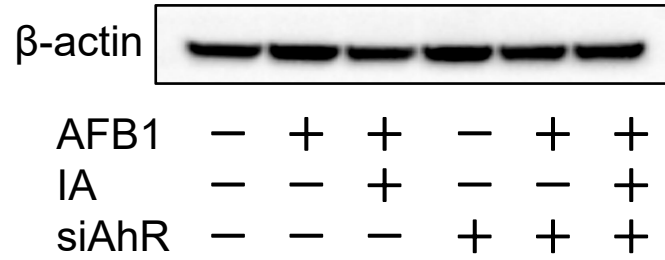

Replicate 1

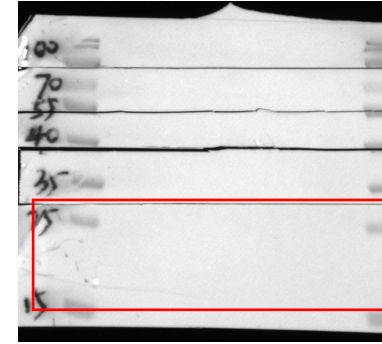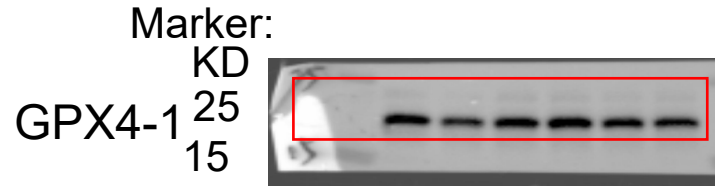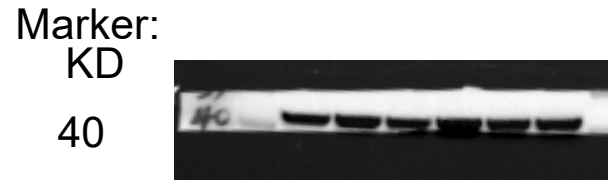

Replicate 2

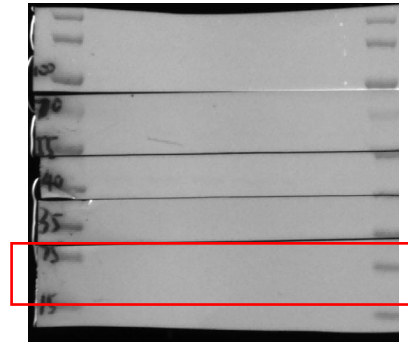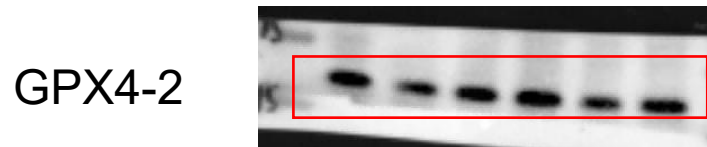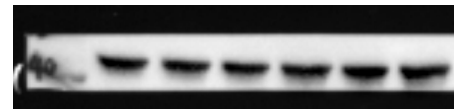

Replicate 3

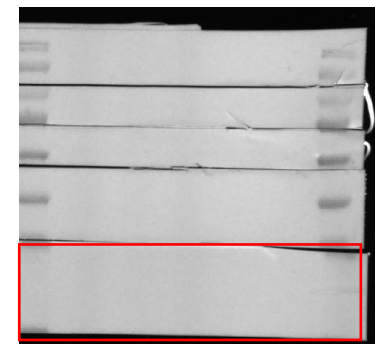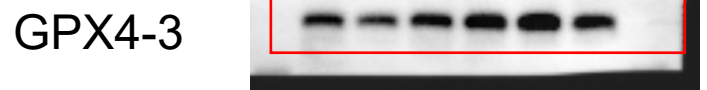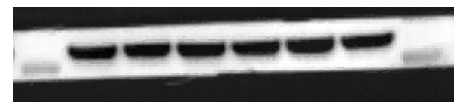

Figure-S4F-HO-1

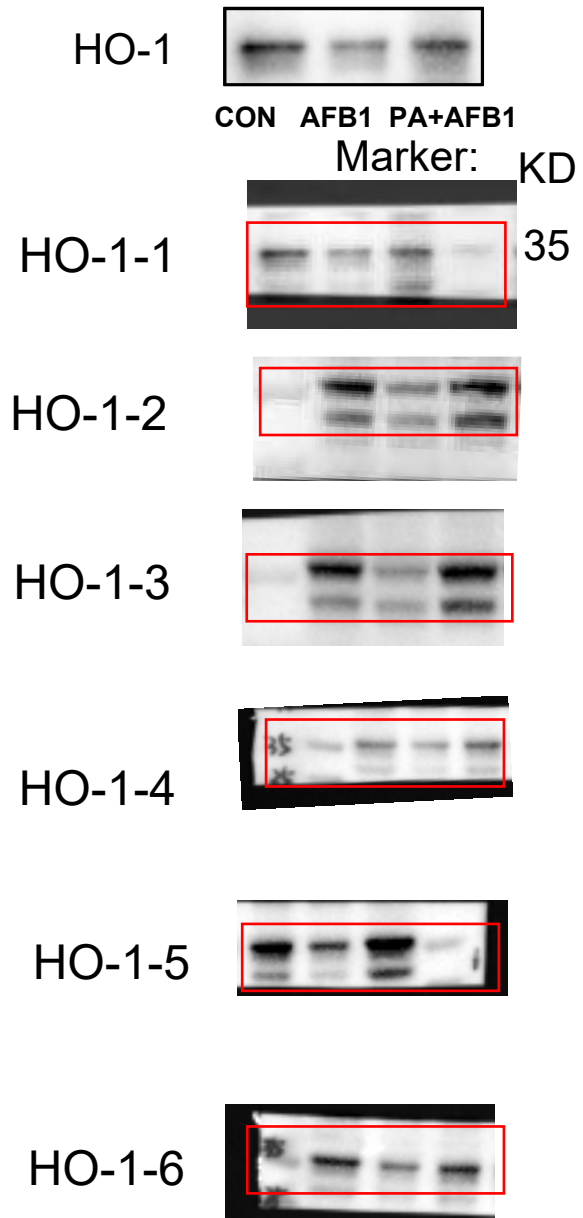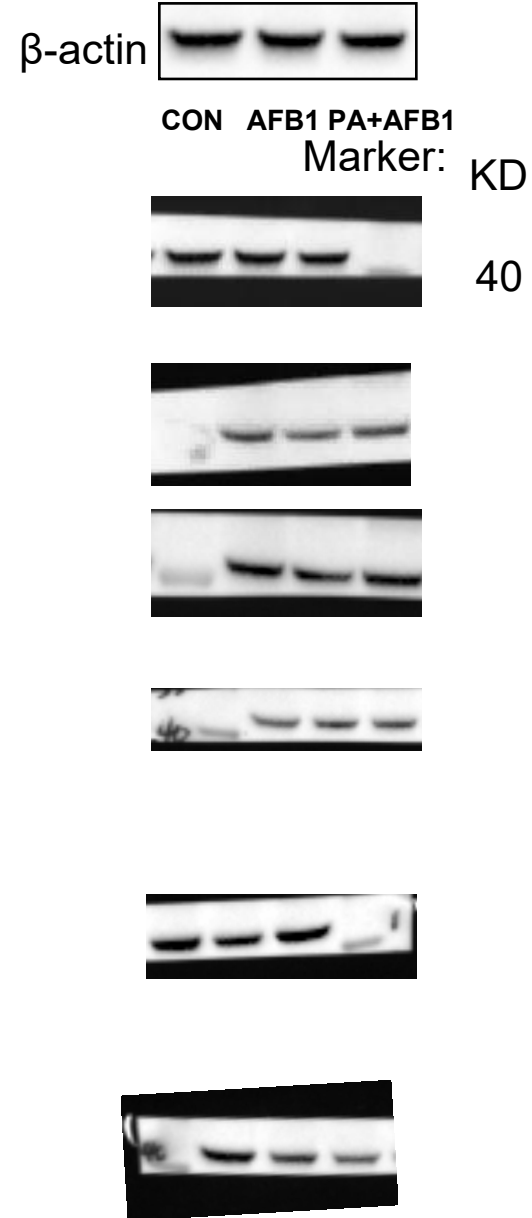

Replicate 1

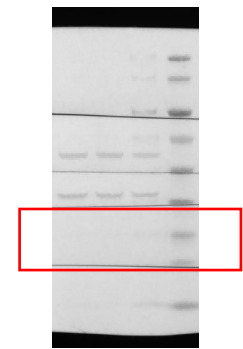

Replicate 2

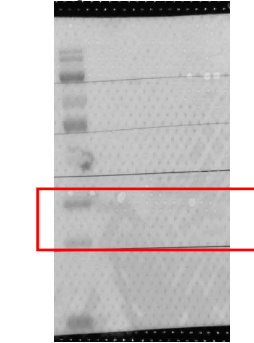

Replicate 3

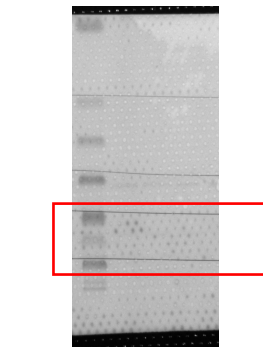

Replicate 4

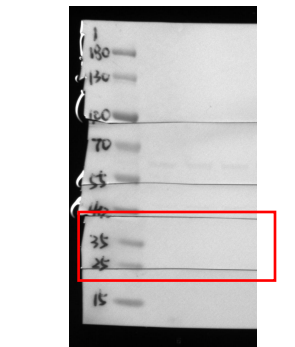

Replicate 5

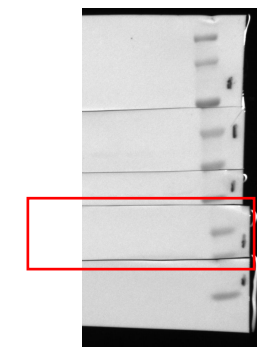

Replicate 6

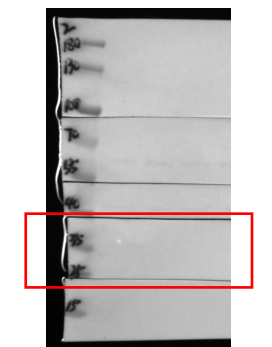

Figure-S4F-xCT

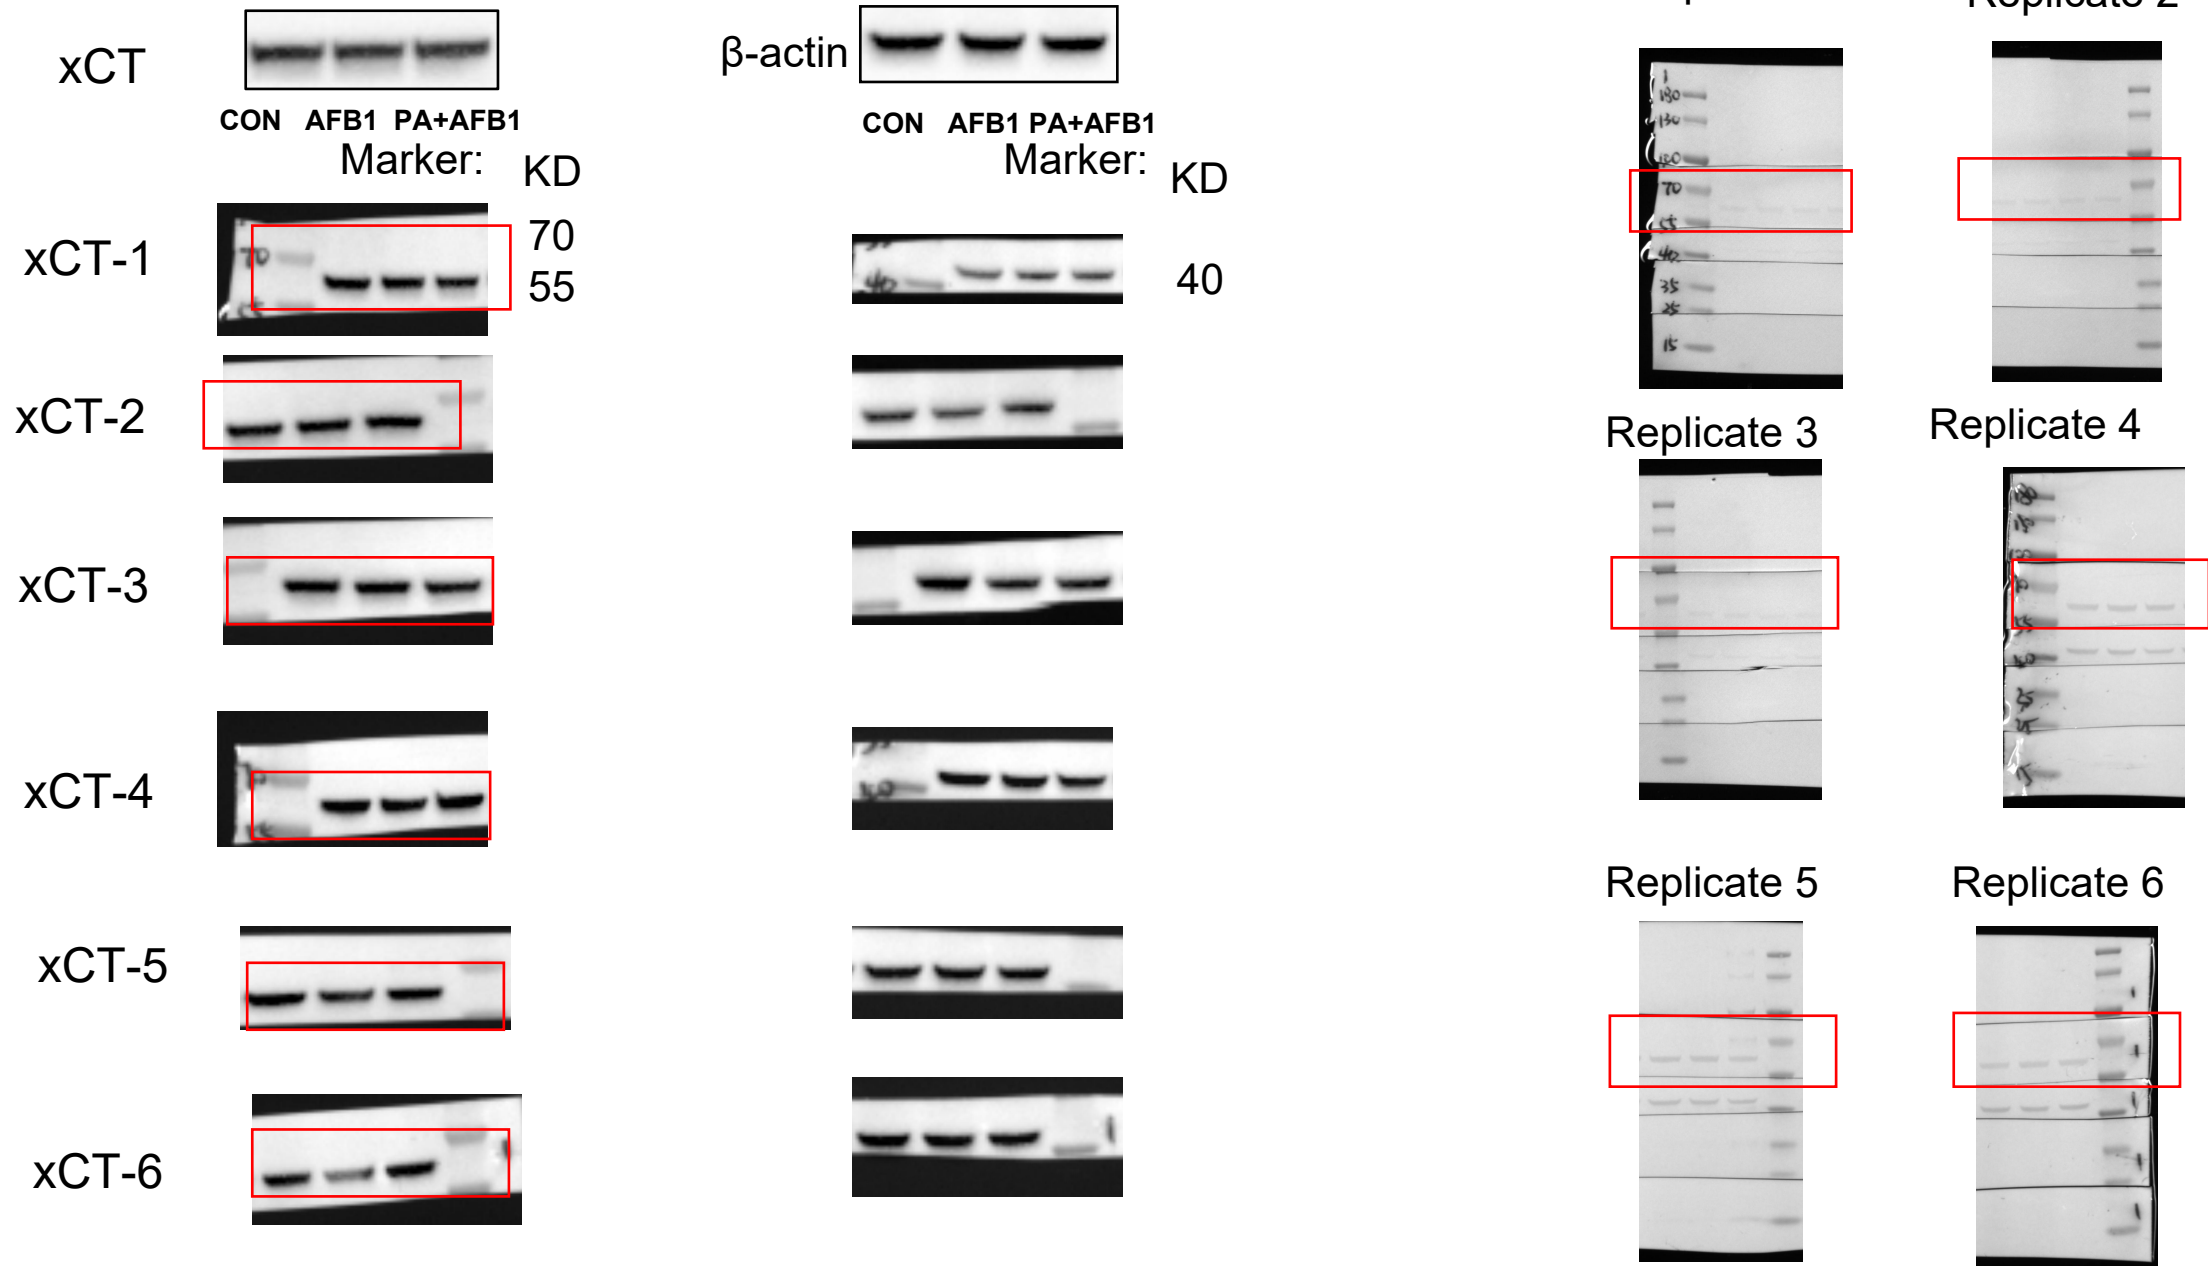

Figure-S4F-GPX4

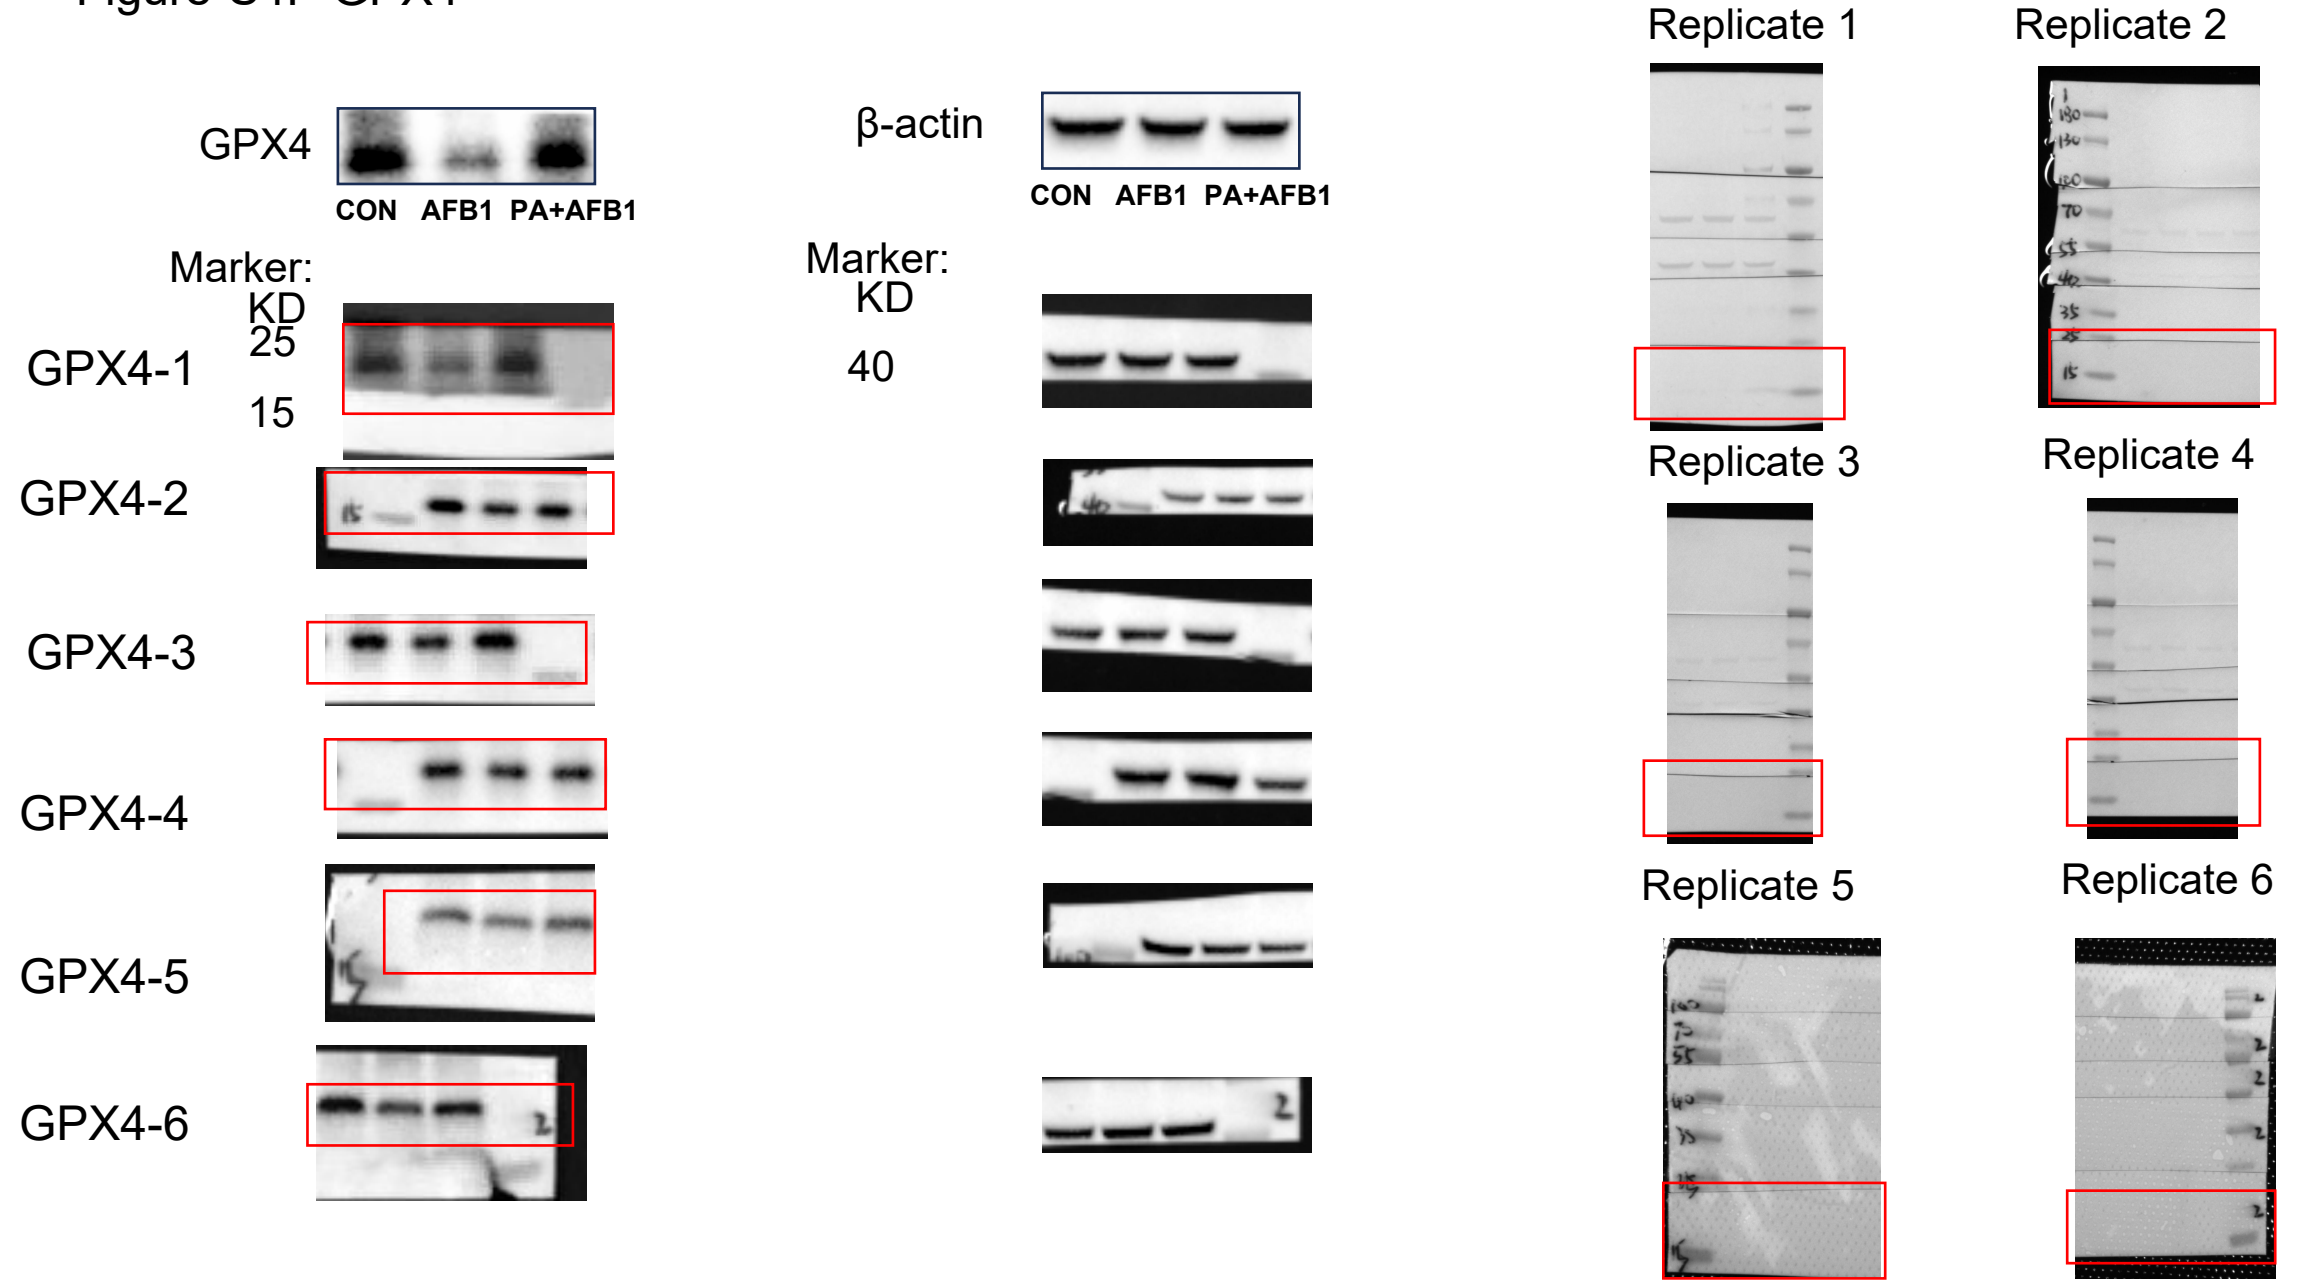

Figure-S6H-AhR

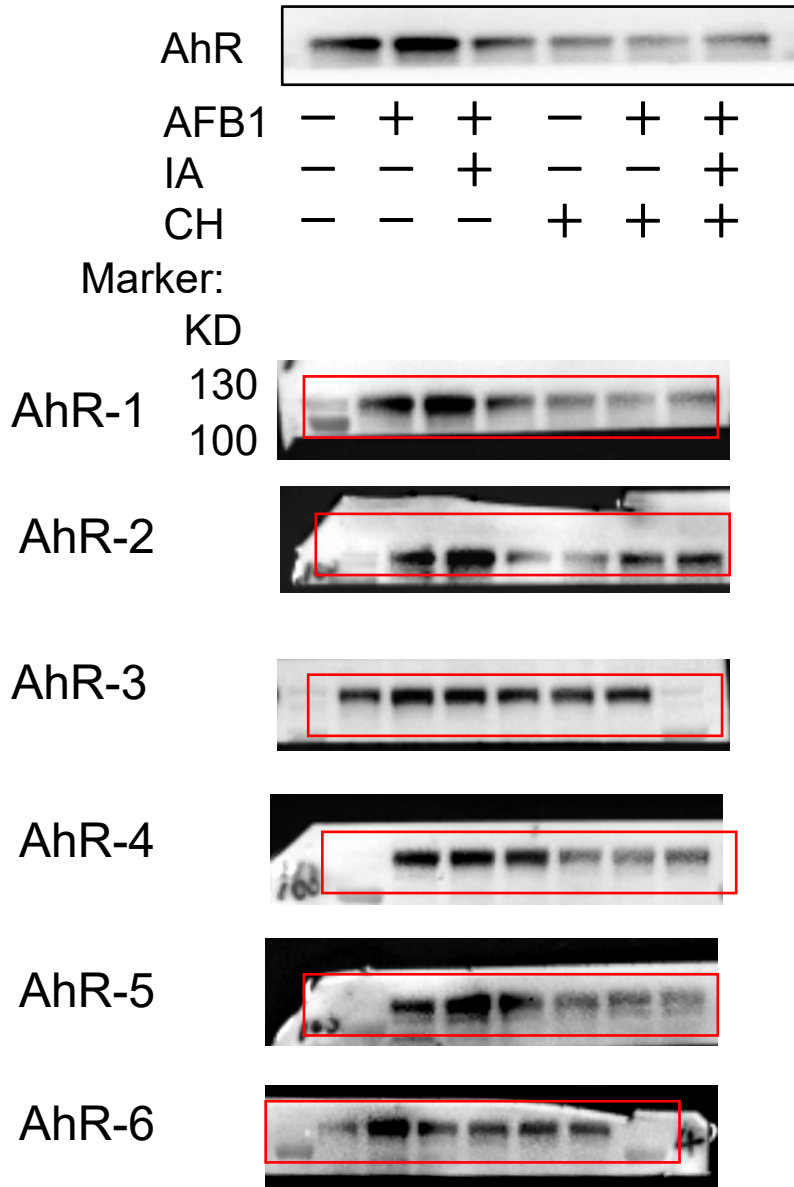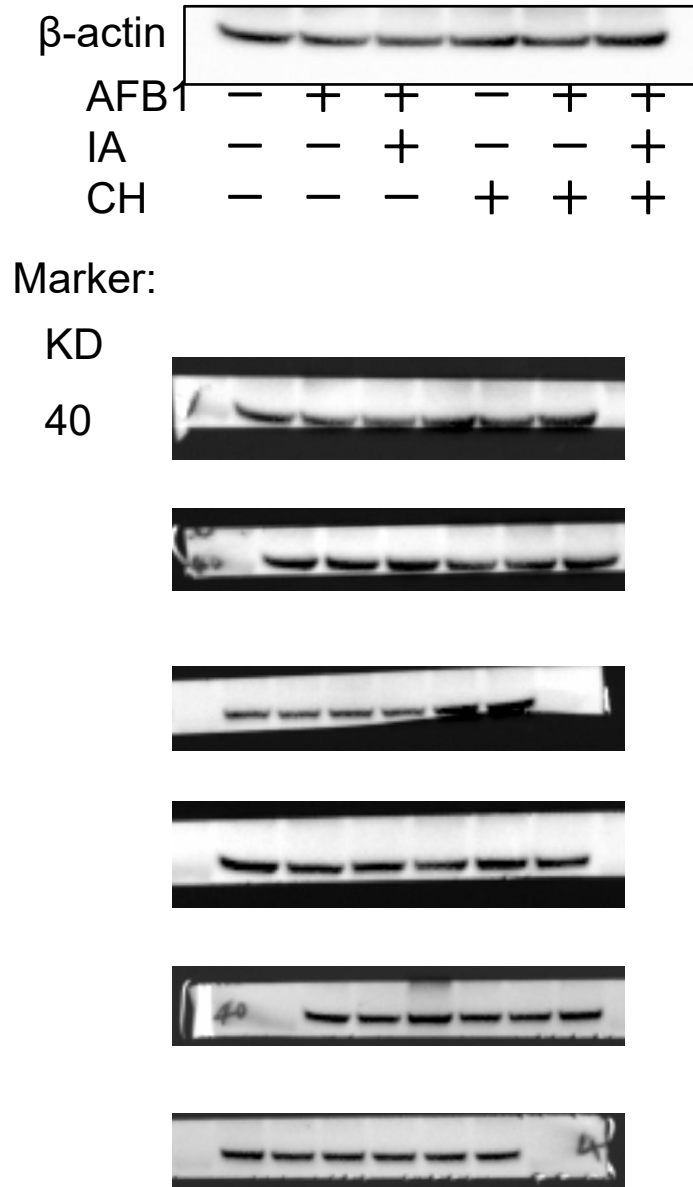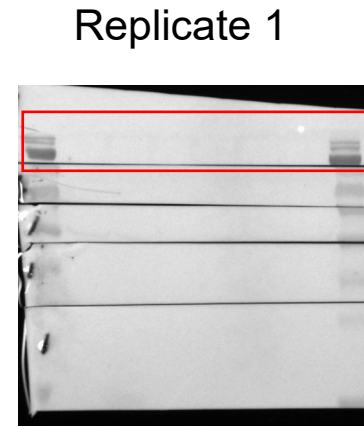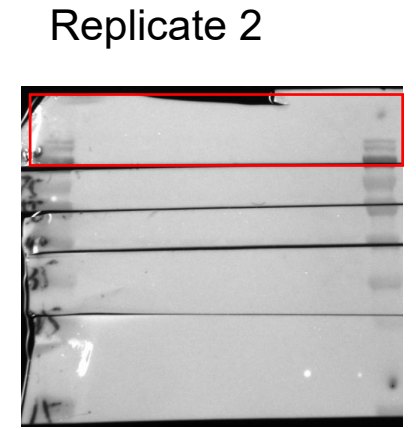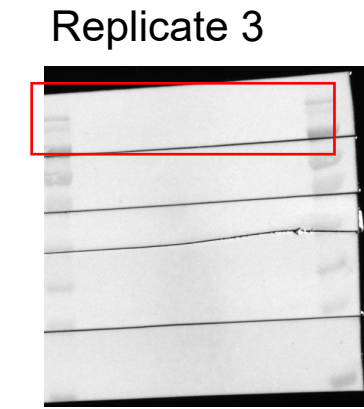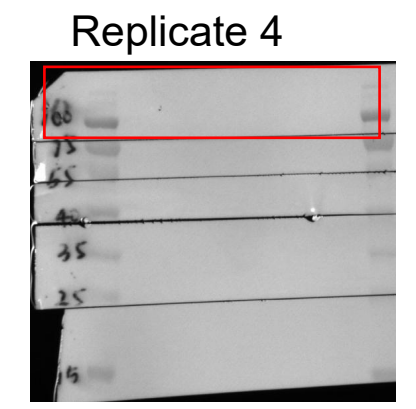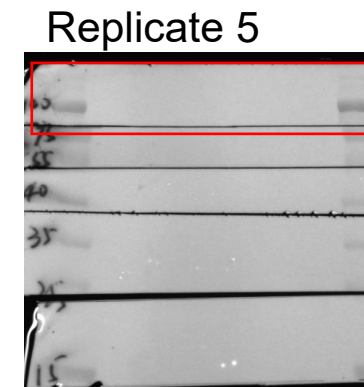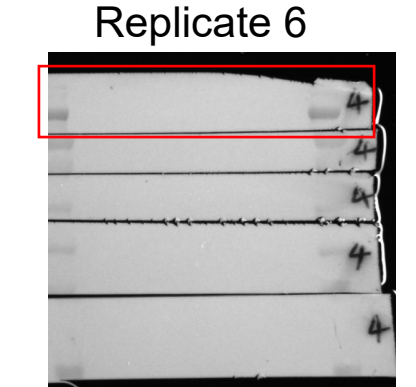

Figure-S6H-HO-1

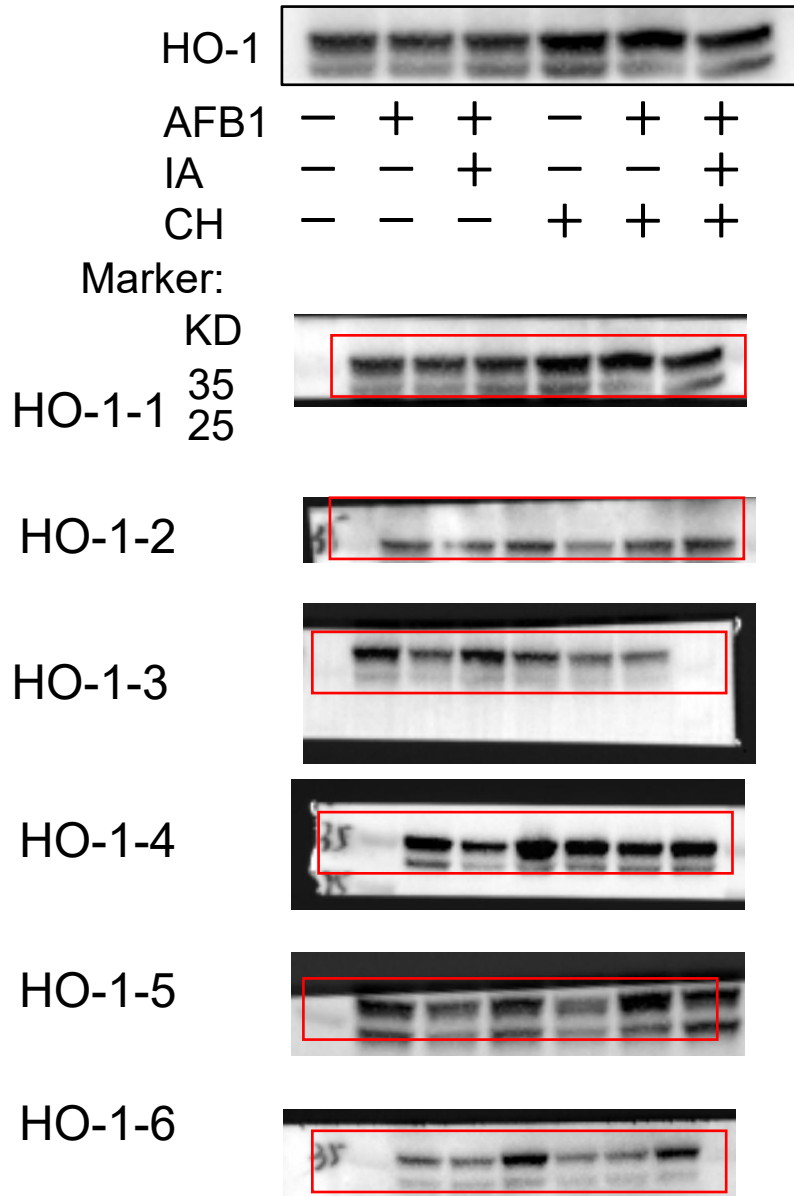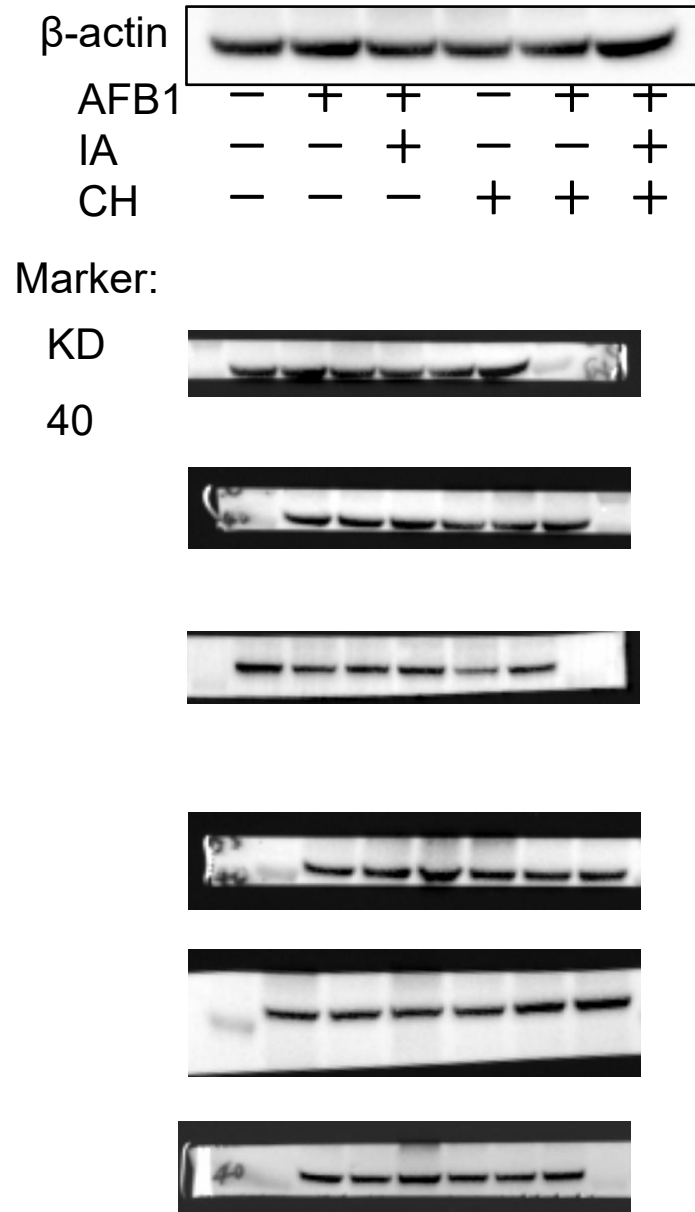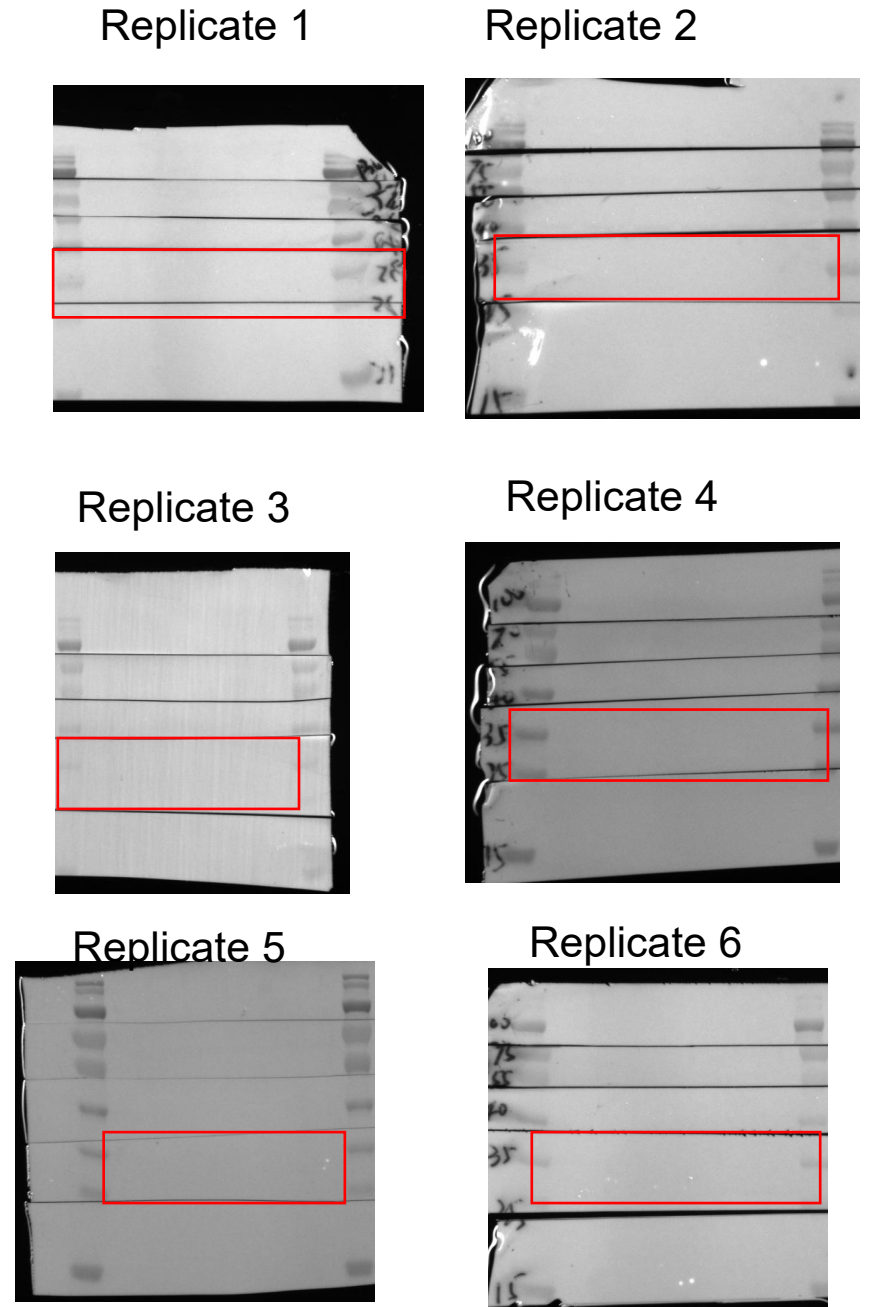

Figure-S6H-xCT

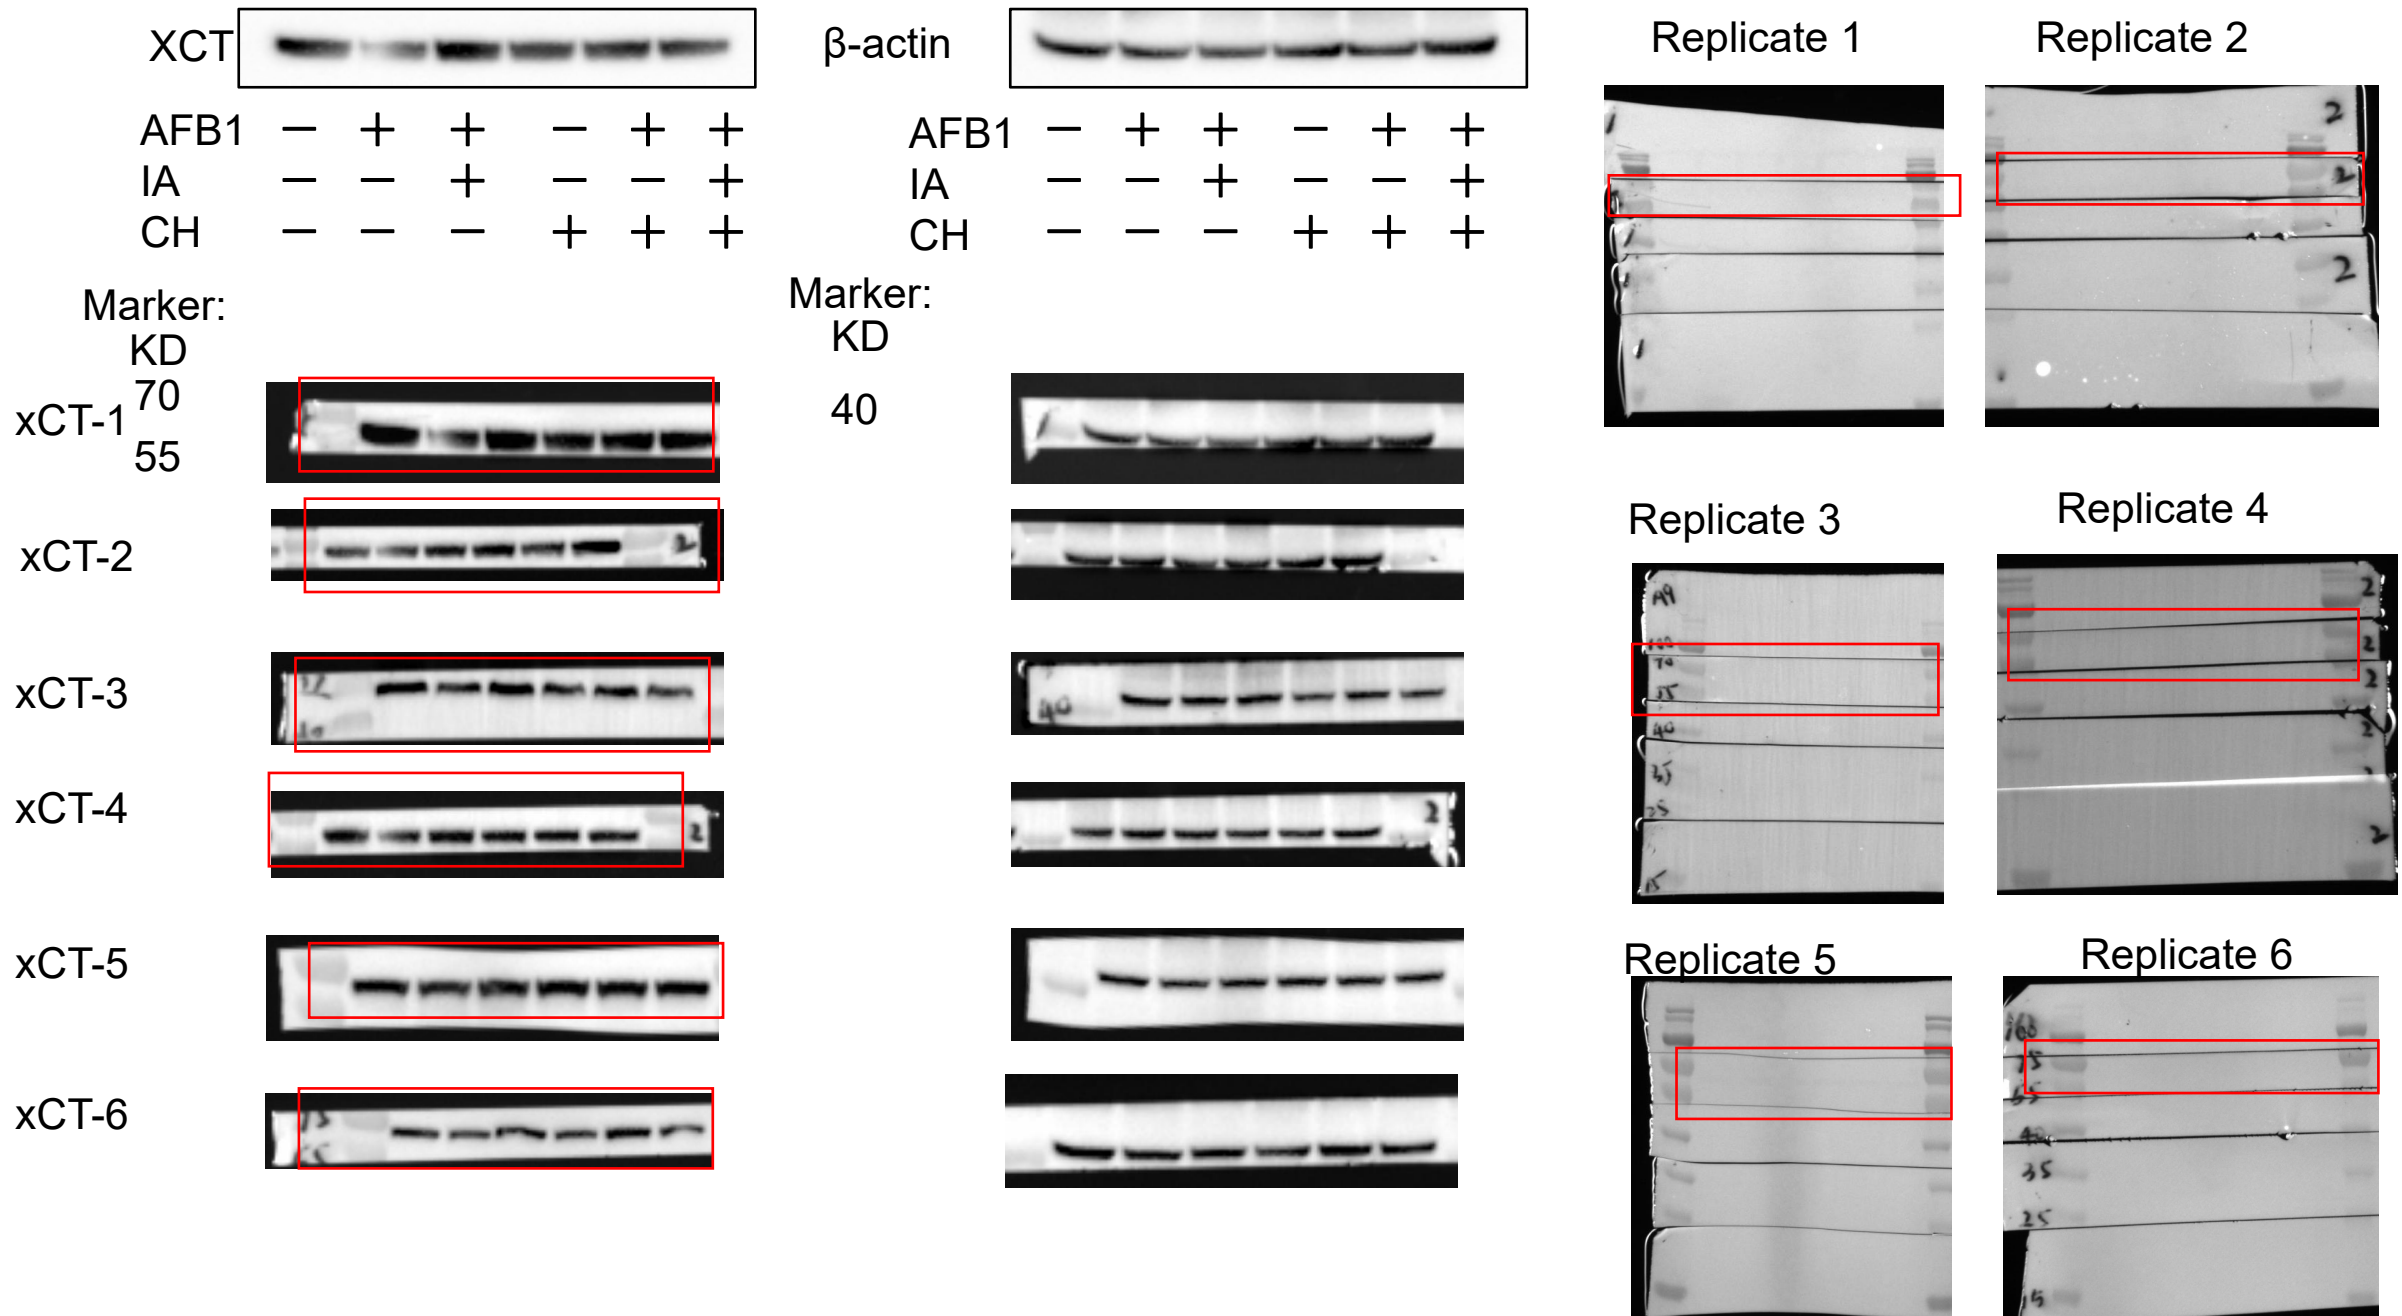

Figure-S6H-GPX4

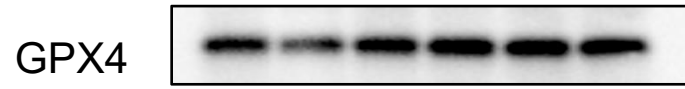

|      |   |   |   |   |   |   |
|------|---|---|---|---|---|---|
| AFB1 | - | + | + | - | + | + |
| IA   | - | - | + | - | - | + |
| CH   | - | - | - | + | + | + |

Marker:

KD

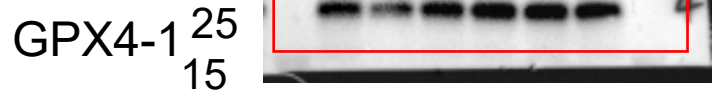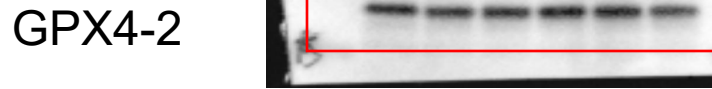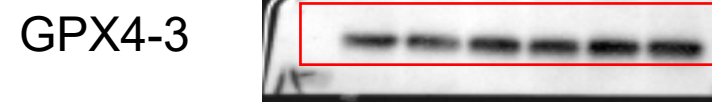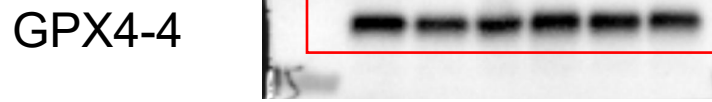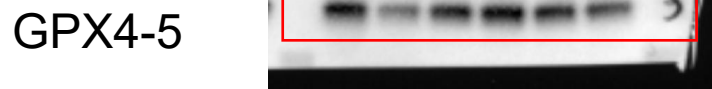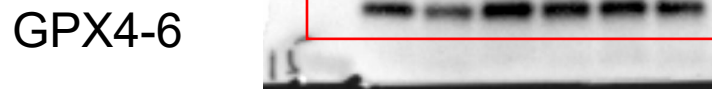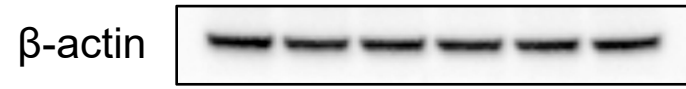

|      |   |   |   |   |   |   |
|------|---|---|---|---|---|---|
| AFB1 | - | + | + | - | + | + |
| IA   | - | - | + | - | - | + |
| CH   | - | - | - | + | + | + |

Marker:

KD

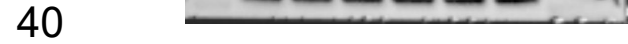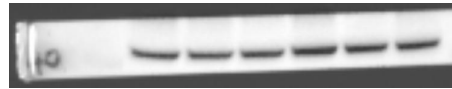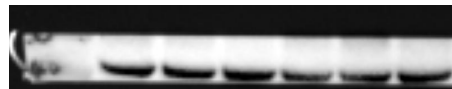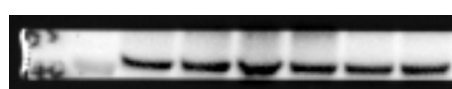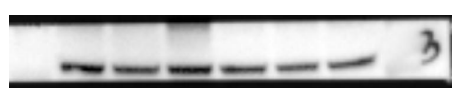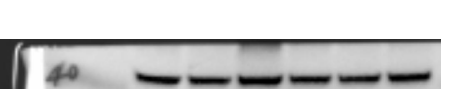

Replicate 1

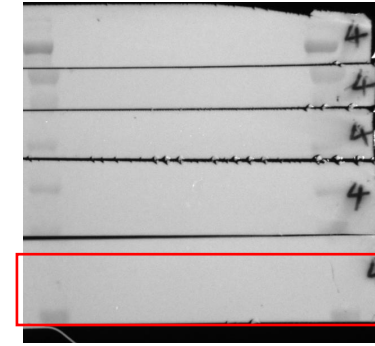

Replicate 3

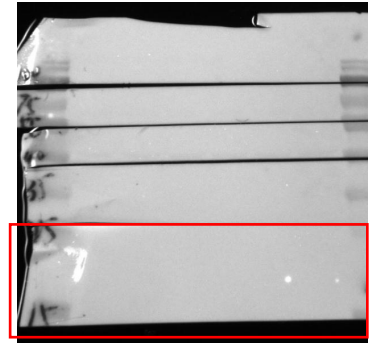

Replicate 5

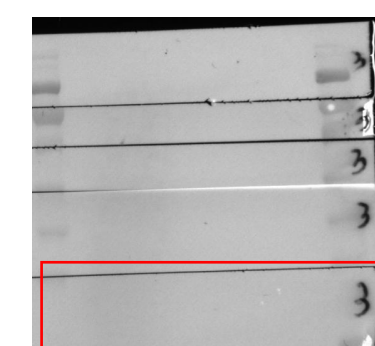

Replicate 2

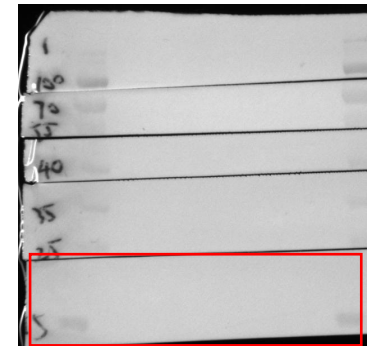

Replicate 4

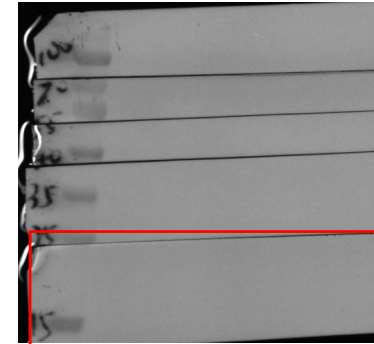

Replicate 6

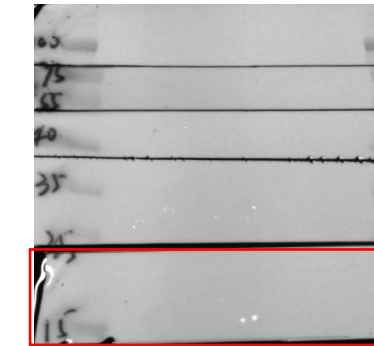

Supplement: Supplementary file 1 [file e1dd588ecce775082b52322d.pdf]
