# Supplementary material
Source: Research Square preprint supplement (doi:10.21203/rs.3.rs-9281710/v1)
Supplement: Supplementary file 2 [file e62f0093909c99c7068b0d77.docx]

**Gut microbiota-derived 3-indoleacrylic acid mediates ferulic acid protection against aflatoxin B1 hepatotoxicity via AhR-ferroptosis inhibition in ducks**

Author names and affiliations:

Qianqian Wang a, Yanan Wang a, Gaigai Wang a, Xin Fang a, Yutong Fu b, Zixin Li a, Yongpeng Guo c, Jinglin Ma d, Lirong Hue, Xiangfang Zeng a, Qiugang Ma a, Matthew Koci f, Lihong Zhao a*

a State Key Laboratory of Animal Nutrition and Feeding, Poultry Nutrition and Feed Technology Innovation Team, College of Animal Science and Technology, China Agricultural University, Beijing 100193, P. R. China.

b School of Life and Environmental Sciences, Faculty of Science, The University of Sydney, Sydney, New South Wales 2006.

c College of Animal Science and Technology, Henan Agricultural University, Zhengzhou 450046, P.R. China.

d College of Veterinary Medicine, Henan Agricultural University, Zhengzhou 450046, P.R. China.

e State Key Laboratory of Genetic Evolution & Animal Models, Kunming Institute of Zoology, Chinese Academy of Sciences, Kunming 650201, China.

f Prestage Department of Poultry Science, North Carolina State University, Raleigh, NC 27695, USA.

**Supplementary Tables**

**Table S1.** The reagents used in this study.

| **Reagent** | **Source** | **Identifier** |
| --- | --- | --- |
| 3-Indoleacrylicacid | Yuanye | Cat# B27120 |
| ACK buffer | ThermoFisher | Cat# A1049201 |
| ACK buffer | ThermoFisher | Cat# A1049201 |
| Aflatoxin B1 | Pribolab | Cat# MSS1003 |
| Ampicillin | Solarbio | Cat# A6920 |
| Ampicillin | Solarbio | Cat# A6920 |
| CH-223191 | MedChemExpress | Cat# HY-12684 |
| Clodronate liposomes | Liposoma | Cat# CP-005-005 |
| Dexamethasone | Sigma | Cat# D4902 |
| DMEM/F-12 medium | Gibco | Cat# C11330500BT |
| Enhanced chemiluminescence | Beyotime | Cat# P0018AS |
| Enhanced chemiluminescence | Beyotime | Cat# P0018AS |
| FerroOrange fluorescent probe | DojinDo | Cat# F374 |
| Ferrostatin-1 | MedChemExpress | Cat# HY-100579 |
| Ferulic acid | Yuanye | Cat# B20007 |
| Fetal bovine serum | Gibco | Cat# 10099141C |
| Indole | Yuanye | Cat# B25916 |
| Indole-3-glyoxylic acid | Yuanye | Cat# S42858 |
| Insulin-transferrin-selenium media supplement | Beyotime | Cat# C0343 |
| Kynurenic acid | Yuanye | Cat# B50754 |
| Lipofectamine 3000 | ThermoFisher | Cat# L3000015 |
| Neomycin | Solarbio | Cat# N8090 |
| Opti-MEM | Gibco | Cat# 31985070 |
| PageRuler Prestained Protein Ladder | Thermo | Cat# 26616 |
| PBS | Gibco | Cat# C10010500BT |
| Penicillin/streptomycin | Gibco | Cat# 15140122 |
| Protease and phosphatase inhibitor cocktail | Beyotime | Cat# P1045 |
| RIPA lysis buffer | Beyotime | Cat# P0013B |
| [Streptomycin](https://www.sciencedirect.com/topics/earth-and-planetary-sciences/streptomycin" \o "Learn more about streptomycin from ScienceDirect's AI-generated Topic Pages) | Solarbio | Cat# S8290 |
| Xanthurenic acid | Yuanye | Cat# B27395 |
| Zombie Aqua | BioLegend | Cat# 423102 |

**Table S2.** Antibody information in this study.

| **Antibody** | **Source** | **Identifier** | **Dilution** |
| --- | --- | --- | --- |
| CD11b-PerCP-Cy5.5 | BioLegend | Cat# 101228 | 1:1000 |
| CD45-APC-Cy7 | BioLegend | Cat# 103115 | 1:1000 |
| CD206-PE | BioLegend | Cat# 141706 | 1:1000 |
| F4/80-BV421 | BioLegend | Cat# 123131 | 1:1000 |
| AhR antibody | Abmart | Cat# PK35465S | 1:2000 |
| HO-1 polyclonal antibody | proteintech | Cat# 10701-1-AP | 1:3000 |
| xCT ntibody | Abmart | Cat# T57046 | 1:1000 |
| GPX4 monoclonal antibody | proteintech | Cat# 67763-1-Ig | 1:1000 |
| β-actin antibody | Proteintech | Cat# 66009-1-Ig | 1:10000 |
| CYP1A1 polyclonal antibody | proteintech | Cat# 13241-1-AP | 1:1000 |
| F4/80 polyclonal antibody | proteintech | Cat# 29414-1-AP | 1:1000 |
| HRP-conjugated goat anti-rabbit IgG(H+L) | SA00001-2 | Cat# SA00001-2 | 1:10000 |

**Table S3.** The quantitative real-time PCR primers used in this study.

| **Target genes** | Forward primer sequence (5' to 3') | Reverse primer sequence (5' to 3') |
| --- | --- | --- |
| **Ducks** |  |  |
| *GADPH* | CTACTCATGGCCACTTCCGG | GGTAAGCTTCCCGTTGAGC |
| *IL-1β* | TCGCTCAGGGTCACAAGAAA | CATCAGAGGCAAGGAGGAAAAC |
| *IL-6* | TGGAGTCACAGAAGGAGTGGCTAAG | TCTGACCACAGTGAGGAATGTCCAC |
| *IL-8* | GGTGATATTCGAGACCATTTACTG | GCCAACAGTAGCCTTCACCCAT |
| *TNF-α* | CCAGACCCTCACACTCAGATC | AGTTGGTTGTCTTTGAGATCCATG |
| *ZO-1* | ACGCTGGTGAAATCAAGGAAGAA | AGGGACATTCAACAGCGTGGC |
| *ZO-2* | ACAGTGAAAGAAGCTGGCGTAG | GCTGTATTCCCTGCTACGGTC |
| **Mice** |  |  |
| *GADPH* | AGGTCGGTGTGAACGGATTTG | TGTAGACCATGTAGTTGAGGTCA |
| *AhR* | TCCCACATCCGCATGATTAA | ATGATGTAATCTGGTCTTCCATTTCTG |
| *IL-1β* | TCGCTCAGGGTCACAAGAAA | CATCAGAGGCAAGGAGGAAAAC |
| *IL-6* | TGGAGTCACAGAAGGAGTGGCTAAG | TCTGACCACAGTGAGGAATGTCCAC |
| *IL-8* | CAATCCTAGTTTGATACTCCC | AATTACTAATATTGACTGTGGAG |
| *TNF-α* | CCAGACCCTCACACTCAGATC | AGTTGGTTGTCTTTGAGATCCATG |
| *GPX4* | GCCTGGATAAGTACAGGGGTT | CATGCAGATCGACTAGCTGAG |
| *CISD1* | GCTGTGCGAGTTGAGTGGAT | TGGTGCGATTCTCTTTAGCGTA |
| *FPN* | GTTTGCAGGAGTCATTGCTGCTA | TTACATTTTCTTGCAGCAACTGTGT |
| **Bacteria** |  |  |
| *P.anaerobius* | AGACGAATTCAAGTCAGTAAATACA | CTCCTATCCACCAGGATATCAA |
| *P.russellii* | GAGCGGTATTAGCAAGCGTTA | CCTTCCTCCAGTCTCGCTTCA |
| *P.stomatis* | CGATCGATCGCTGCTGCTAG | GCTAGCTGCTAGCTAGCTCG |
| *C.sporogenes* | ATGTTTGATAGTTTGGCTGG | TTATCCTTTTCTAGCCGTTG |
| *ArAT* | CGGTTCTCAGCAGTGTC | CGTCTCCGTCTGTTGGT |
| *fldB* | CCATCCTTTAGAGCGTTTA | ATGCTTGGGCACTTTGT |
| *fldC* | AGCAGAGGGTGAAGTAA | CAGTTCTGGCTAAGTCC |
| *fldH* | GGAGGTATCGTTGTTGA | GTGCCTTATGAGTTCTTTT |
| *acdA* | GGCTGCTGCTGGTTTCT | CCTGCTGATGCGTCTGT |

**Supplementary Figures**


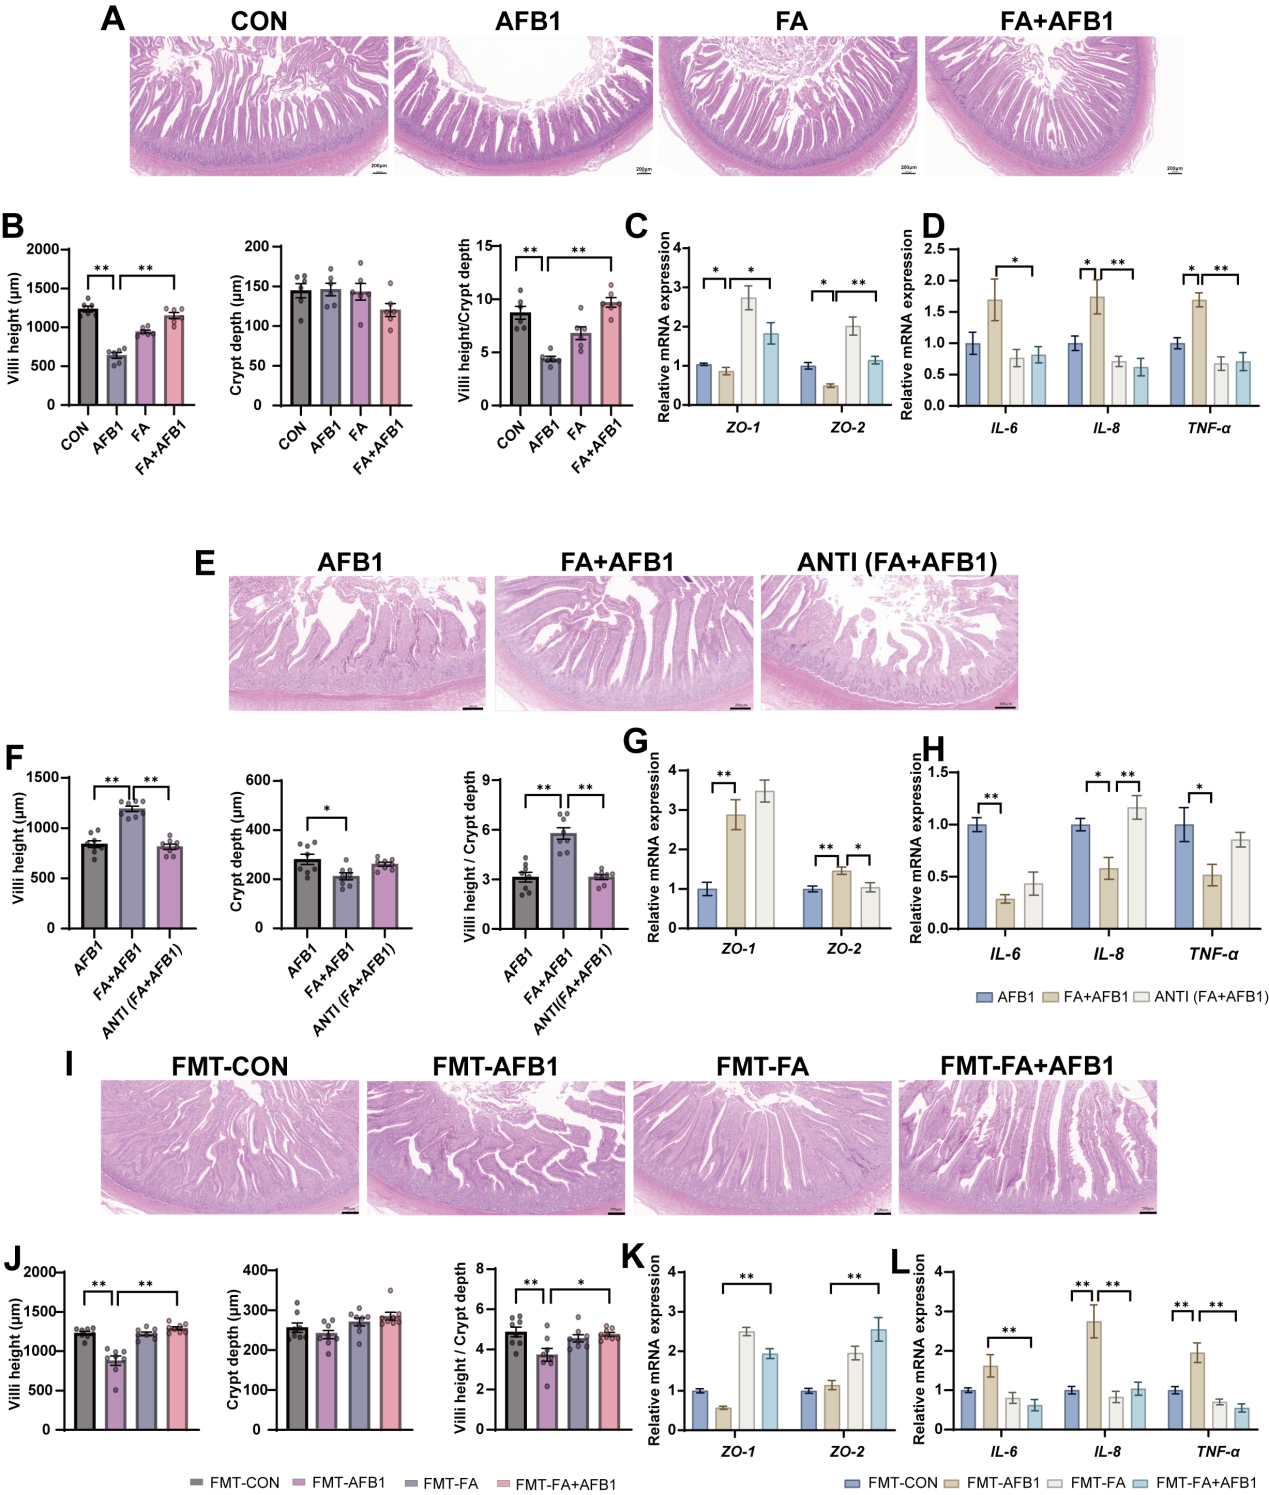


Figure S1. FA alleviated AFB1-triggered jejunal damage in a gut microbe-dependent manner. (A) Representative image of H&E staining in the jejunum of ducks among CON, AFB1, FA, and FA+AFB1 groups. n=3. (B) Jejunal villi height, crypt depth, and villi height/crypt depth in the jejunum of ducks among CON, AFB1, FA, and FA+AFB1 groups, respectively, n=6. (C) The relative mRNA expression of *ZO-1* and *ZO-2* in the jejunum of ducks among CON, AFB1, FA, and FA+AFB1 groups, n=6. (D) The relative mRNA expression of *IL-6*, *IL-8*,and *TNF-α* in the jejunum of ducks among CON, AFB1, FA, and FA+AFB1 groups, n=6. (E) Representative image of H&E staining in the jejunum of ducks among AFB1, FA+AFB1, and ANTI(FA+AFB1) groups, n=3. (F) Jejunal villi height, crypt depth, and villi height/crypt depth in the jejunum of ducks among AFB1, FA+AFB1, and ANTI(FA+AFB1) groups, respectively, n=8. (G) The relative mRNA expression of *ZO-1* and *ZO-2* in the jejunum of ducks among AFB1, FA+AFB1, and ANTI(FA+AFB1) groups, n=8. (H) The relative mRNA expression of *IL-6*, *IL-8*,and *TNF-α* in the jejunum of ducks of AFB1, FA+AFB1, and ANTI(FA+AFB1) groups, n=8. (I) Representative image of H&E staining in the jejunum of ducks among FMT-CON, FMT-AFB1, FMT-FA, and FMT-FA+AFB1 groups. n=3. (J) Jejunal villi height, crypt depth, and villi height/crypt depth in the jejunum of ducks among FMT-CON, FMT-AFB1, FMT-FA, and FMT-FA+AFB1 groups, respectively, n=8. (K) The relative mRNA expression of *ZO-1* and *ZO-2* in the jejunum of ducks among CON, AFB1, FA, and FA+AFB1 group, n=8. (L) The relative mRNA expression of *IL-6*, *IL-8*,and *TNF-α* in the jejunum of ducks among FMT-CON, FMT-AFB1, FMT-FA, and FMT-FA+AFB1 groups, n=8.Note: The level of significance was set at *P* < 0.05; *, *P* < 0.05; **, *P* < 0.01.


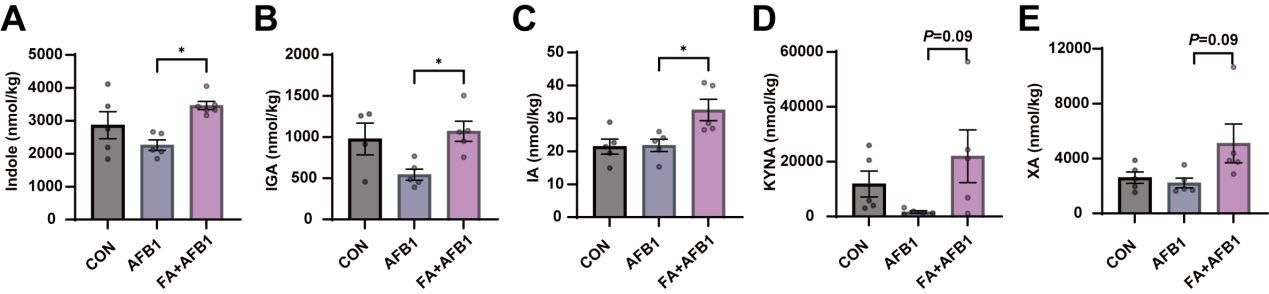


Figure S2. FA alleviated AFB1-induced dysregulation of tryptophan metabolites in ducks. (A-E) Contents of indole, indole-3-glyoxylic acid (IGA), 3-indoleacrylic acid (IA), kynurenic acid (KYNA), and xanthurenic acid (XA) in cecal chyme of ducks, n=5. Note: The level of significance was set at *P* < 0.05; *, *P* < 0.05; **, *P* < 0.01.


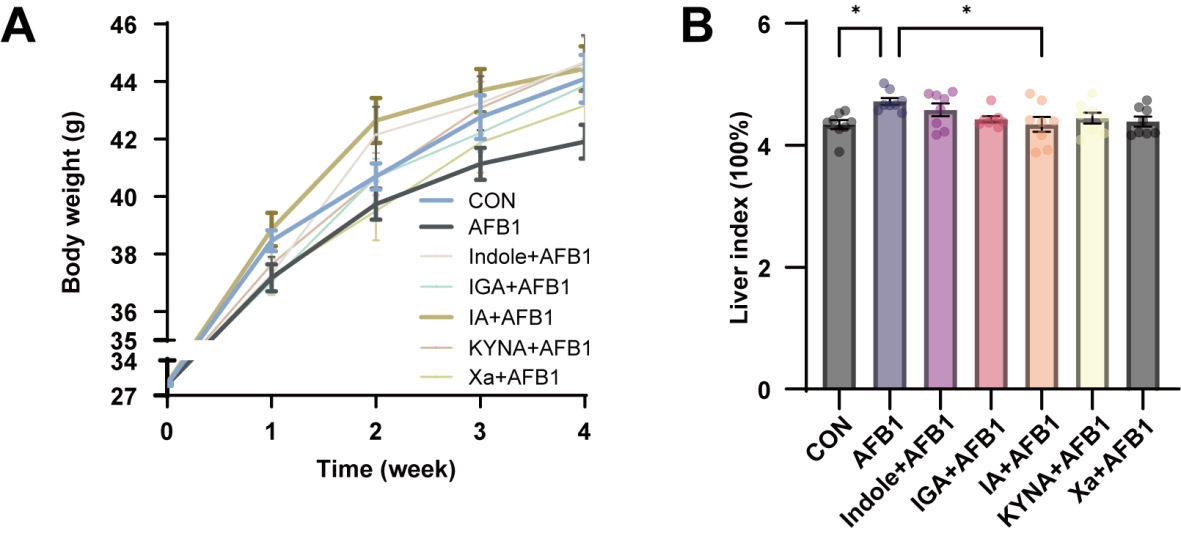


Figure S3. Tryptophan metabolites alleviated AFB1-induced reduction in growth performance of mice. (A) Changes in body weight of mice, n=8. (B) Liver index of mice, n=8. Note: The level of significance was set at *P* < 0.05; *, *P* < 0.05; **, *P* < 0.01.


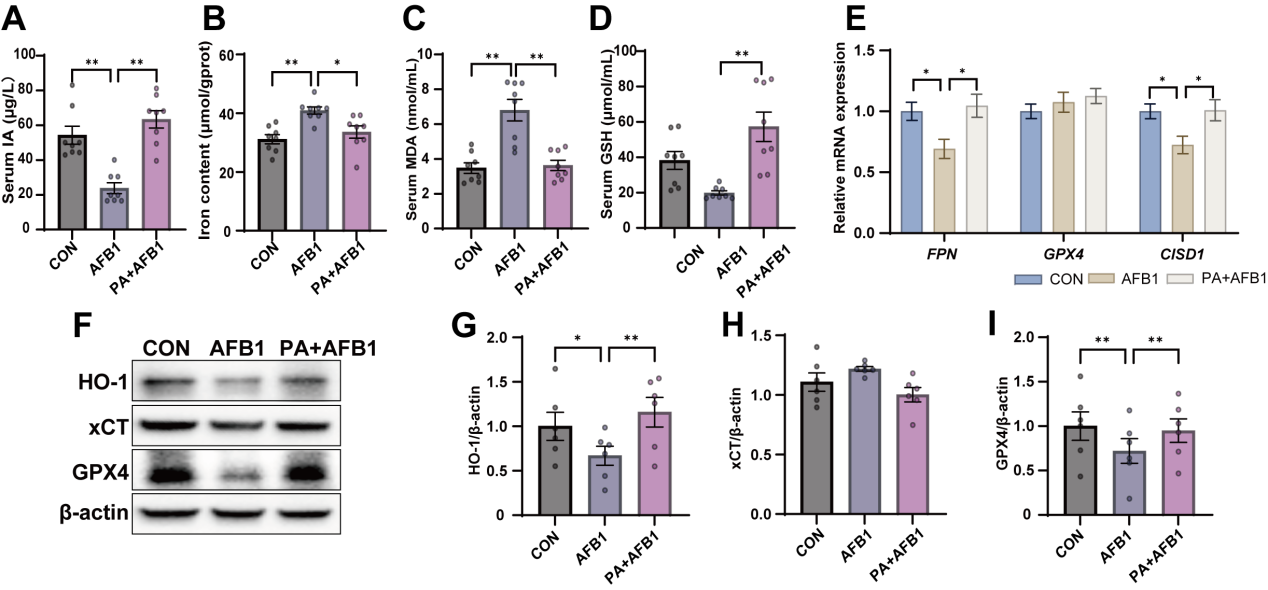


Figure S4. *P. anaerobius* inhibited AFB1-induced hepatic ferroptosis in mice. (A) The level of IA in the serum of mice, n=8. (B) Hepatic iron content in mice, n=8. (C, D) The level of MDA and GSH in the serum of mice, n=8. (E) The relative mRNA expression of *FPN*, *GPX4,* and *CISD1* in the liver of mice, n=8. (F-I) Western blot analysis and quantification of HO-1, xCT, and GPX4 protein expression in the liver of mice, n=6. Note: The level of significance was set at *P* < 0.05; *, *P* < 0.05; **, *P* < 0.01.


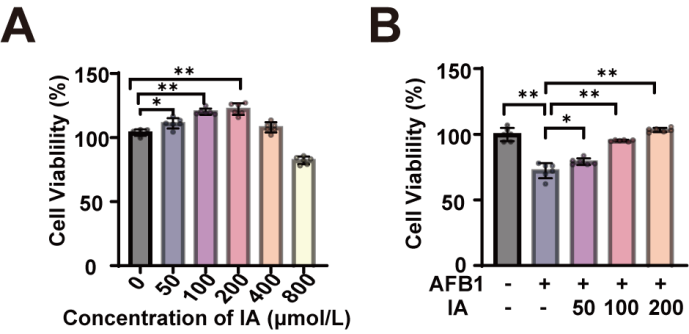


Figure S5. IA attenuated AFB1-induced AML12 cell cytotoxicity. (A) Viability of AML12 hepatocytes treated with different concentrations of IA, n=6. (B) IA-mediated cytoprotection against AFB1-induced toxicity, n=6. Note: The level of significance was set at *P* < 0.05; *, *P* < 0.05; **, *P* < 0.01.

**
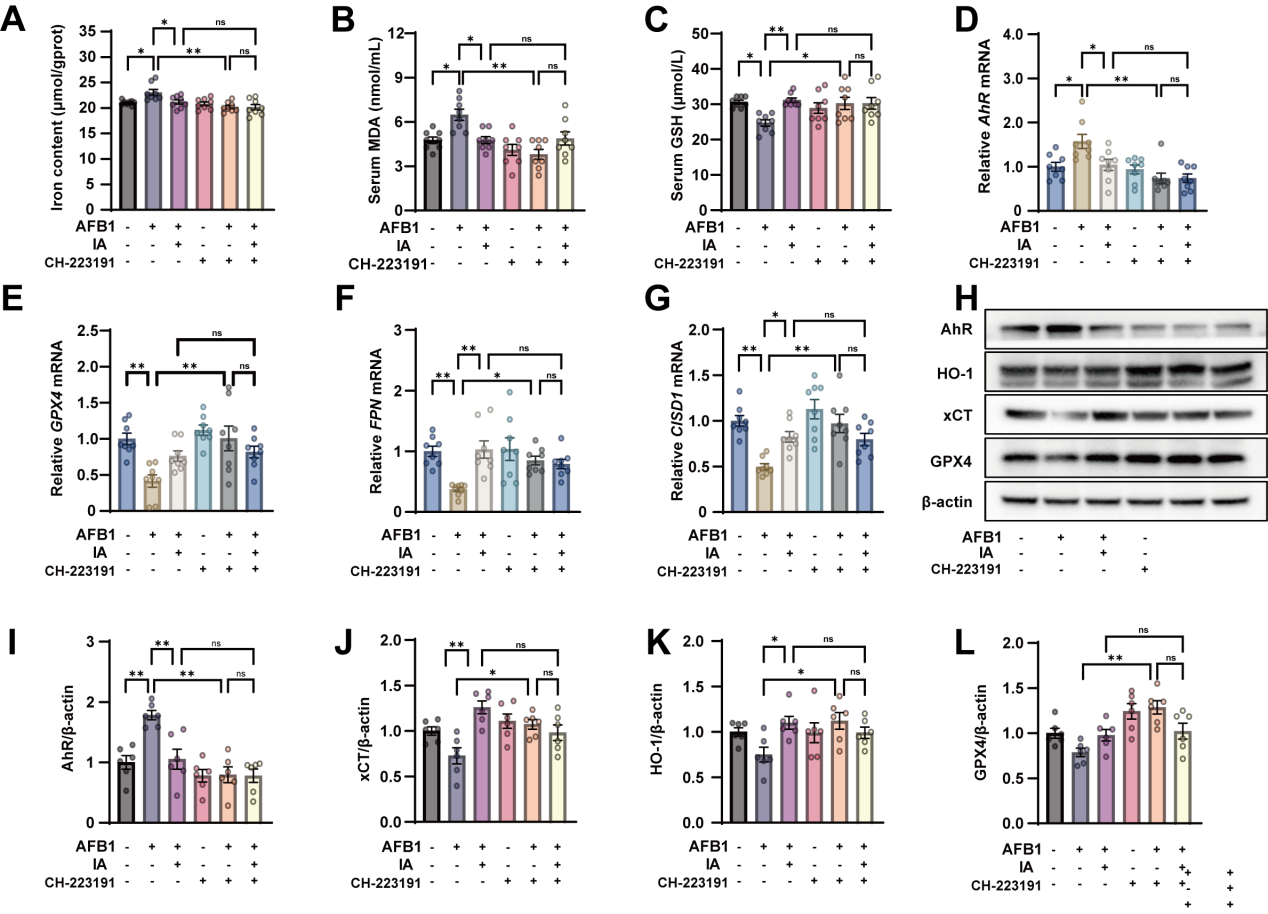
**

Figure S6. The impact of AhR inhibition on IA-regulated ferroptosis of mouse liver cells induced by AFB1. (A) Hepatic iron content in mice, n=8. (B, C) The level of MDA and GSH in the serum of mice, n=8. (D-G) The relative mRNA expression of *AhR, GPX4, FPN* and *CISD1* in the liver of mice, n=8. (H-L) Western blot analysis and quantification of AhR, HO-1, xCT, and GPX4 protein expression in the liver of mice, n=6. Note: The level of significance was set at *P* < 0.05; *, *P* < 0.05; **, *P* < 0.01.
